# Supplementary material
Source: publisher site journal article supplement (https://www.spandidos-publications.com/7582/downloadSupplementary)
Supplement: Supplementary file 1 [file downloadSupplementary]

## Sheet: Table SXIV
Table SXIV. Immunocyte abundance in the training cohort (GSE185263) estimated by CIBERSORT.
ID	B_cells_naive_CIBERSORT	B_cells_memory_CIBERSORT	Plasma_cells_CIBERSORT	T_cells_CD8_CIBERSORT	T_cells_CD4_naive_CIBERSORT	T_cells_CD4_memory_resting_CIBERSORT	T_cells_CD4_memory_activated_CIBERSORT	T_cells_follicular_helper_CIBERSORT	T_cells_regulatory_(Tregs)_CIBERSORT	T_cells_gamma_delta_CIBERSORT	NK_cells_resting_CIBERSORT	NK_cells_activated_CIBERSORT	Monocytes_CIBERSORT	Macrophages_M0_CIBERSORT	Macrophages_M1_CIBERSORT	Macrophages_M2_CIBERSORT	Dendritic_cells_resting_CIBERSORT	Dendritic_cells_activated_CIBERSORT	Mast_cells_resting_CIBERSORT	Mast_cells_activated_CIBERSORT	Eosinophils_CIBERSORT	Neutrophils_CIBERSORT	P-value_CIBERSORT	Correlation_CIBERSORT	RMSE_CIBERSORT
GSM5608946	0.0114375	0	0.0459883	0.0162209	0.0519995	0	0.0363901	0	0	0.0246347	0.0413205	0	0.141719	0	0	0.0295507	0	0	0.0505453	0	0	0.550193	0.009	0.294494	1.05477
GSM5608947	0	0.0305198	0.0237599	0.0112695	0.000300062	0.0356505	0.0353402	0	0	0.0137066	0.0339146	0	0.01201	0	0	0	0	0.0114551	0.0277731	0	0	0.764301	0.013	0.256378	1.17487
GSM5608948	0.0198584	0	0.00930521	0.0336629	0.00812251	0	0.094493	0	0	0.0893538	0.0422971	0	0	0	0	0.00869251	0	0.0145405	0.0256986	0	0	0.653976	0	0.774362	0.635899
GSM5608949	0.0400411	0	0.00546126	0.0378144	0	0.0495174	0.0419139	0	0	0.00317618	0.0448207	0	0	0	0	0.0305073	0.00230055	0.0147046	0.0345846	0	0	0.695158	0	0.810843	0.589008
GSM5608950	0	0.0350732	0.0234579	0.0459138	0.0773816	0.0989331	0.0322199	0	0	0	0.0367556	0	0.1534	0	0	0.01348	0	0.00180565	0.0245394	0	0	0.45704	0	0.628322	0.778061
GSM5608951	0.0595005	0.396814	0	0.196458	0	0.0911241	0.12166	0	0	0	0.0986305	0	0.0197263	0.00241836	0	0.00353214	0	0.000507717	0	0	0	0.00962862	0	0.614849	0.789421
GSM5608952	0.018468	0	0.00180298	0.265411	0.016631	0.173194	0.0856106	0	0	0	0.0135235	0	0.218395	0	0	0.0139156	0	0.00259331	0.0200523	0	0	0.170403	0	0.741467	0.710977
GSM5608953	0	0.0277029	0.00281769	0.0324264	0	0	0.0481958	0.0305363	0	0.0453069	0.0358163	0	0	0	0.000675187	0	0.00374899	0.0130258	0.0185382	0	0	0.74121	0	0.800422	0.610557
GSM5608954	0.00753212	0	0.0115597	0	0.0218334	0.000725376	0.0145798	0	0	0.00814933	0.0252965	0	0.106569	0	0	0	0.00174989	0.0105251	0.0330825	0	0	0.758397	0	0.495542	0.983638
GSM5608955	0.0406063	0.00288919	0	0.0526631	0	0.0804175	0.0469147	0	0	0	0.086904	0	0	0	0.00122565	0	0.0118606	0.00950173	0.026566	0	0	0.640451	0	0.628217	0.796223
GSM5608956	0.0156411	0	0.00864404	0.0228792	0	0	0.00925094	0.0206317	0.00793223	0	0.0556478	0	0.0340634	0	0	0	0	0.0126595	0.0133919	0	0	0.799258	0	0.822978	0.591622
GSM5608957	0.0045664	0.0157079	0.00830051	0.201166	0	0	0.0453615	0.000640269	0.0198057	0	0.157031	0	0.100364	0.010909	0.00167627	0	0	0.000593877	0.0257281	0	0	0.40815	0	0.738428	0.683974
GSM5608958	0.00643247	0	0.00292282	0.0995178	0	0.107616	0.0508419	0	0	0.0817817	0.0907465	0	0.0619622	0	0	0.00524382	0	0.00168325	0.0303539	0	0	0.460898	0	0.818764	0.596828
GSM5608959	0	0	0.00330911	0.0940254	0	0.0381247	0.130695	0	0	0.0676782	0.070805	0	0.189162	0	0.0133189	0.00177128	0	0.00265962	0.0306684	0	0.00223741	0.355545	0	0.722695	0.703605
GSM5608960	0	0.0248351	0.00469292	0.0437243	0	0	0.04972	0.0317218	0	0.0218269	0.0289855	0	0	0	0.00137387	0	0.00432382	0.00976739	0.0166194	0	0	0.762409	0	0.762602	0.668286
GSM5608961	0.00517194	0.0171938	0	0.0557033	0.0348745	0.117797	0.0512303	0	0	0.050171	0.0704118	0	0.128434	0	0	0.0100664	0	0.000855193	0.013392	0	0	0.444699	0	0.723649	0.69422
GSM5608962	0	0.00587153	0.00328678	0.117756	0	0.0948283	0.0418764	0	0.0123413	0.0156427	0.203417	0	0.100578	0	0	0.0153927	0	0.00243233	0.0476252	0	0	0.338952	0	0.770085	0.664096
GSM5608963	0.0257439	0.0319454	0	0.0592372	0.052372	0.142163	0.0277665	0	0	0	0.0515789	0.00487785	0.061226	0	0	0.00355865	0	0	0.0302857	0	0	0.509245	0	0.826536	0.581853
GSM5608964	0	0.0196238	0.00637775	0.374887	0	0	0.110265	0.00434738	0	0	0.160271	0	0.0524381	0	0.00319781	0	0	0.00186994	0.0182678	0	0	0.248454	0	0.687254	0.735607
GSM5608965	0.0184237	0	0.0103923	0.207746	0	0	0.0706931	0.0178765	0.0033487	0.0577052	0.0538896	0	0.0463436	0	0	0.00276636	0	0	0.0179846	0	0	0.492831	0	0.695205	0.719918
GSM5608966	0.0180494	0	0.00870166	0.0333438	0.0312281	0	0	0	0	0	0.0664197	0	0.0421826	0	0	0.0225336	0.00168629	0	0.0317679	0	0	0.744087	0	0.845541	0.54248
GSM5608967	0	0.018892	0.00068478	0.106302	0	0.23275	0.0170523	0	0	0	0.0802375	0	0.0293172	0	0	0.00949145	0	0	0.0197191	0	0.00915327	0.4764	0	0.703338	0.71249
GSM5608968	0.0254121	0.0110599	0.00279488	0.111867	0	0.0875221	0.0583279	0	0	0.0136879	0.104558	0	0.0112244	0	0	0.0135102	0.0116481	0.0145765	0.0247267	0	0	0.509084	0	0.76012	0.656654
GSM5608969	0.0163106	0.0032571	0.00749228	0.0464	0.068454	0	0.0338512	0	0.00128868	0.00875321	0.0554351	0	0.0492191	0	0	0.0338402	0	0	0.0306351	0	0	0.645063	0	0.779406	0.629005
GSM5608970	0	0.0301572	0.00886169	0.144995	0	0.0289836	0.0774447	0.000325657	0	0	0.0753264	0	0.0285604	0	0	0.0090506	0	0.00141274	0.0282949	0	0	0.566587	0	0.784029	0.624746
GSM5608971	0.0234362	0	0.0104819	0.0172283	0.00699648	0.00125524	0.015994	0.00912134	0	0.0127664	0.0529167	0	0	0	0	0.0250347	0.0049485	0.00300447	0.030565	0	0	0.786251	0	0.858604	0.525121
GSM5608972	0.0222703	0.00422239	0	0.0711223	0	0.133384	0.0199634	0	0.0356755	0	0.075532	0.0037267	0.193328	0.0112224	0	0.00804445	0	0	0.0362586	0	0	0.38525	0	0.664362	0.749023
GSM5608973	0	0.0565172	0.144458	0.24447	0	0	0.113065	0.0329786	0.0258577	0	0.166919	0	0.0372424	0.0234423	0.00628947	0	0	0.0104456	0.0270357	0	0.00375753	0.107522	0.01	0.275844	0.98529
GSM5608974	0.0598453	0.0234985	0.0785829	0.26356	0	0	0.108809	0	0.0516153	0	0.096614	0	0.0805537	0	0.00305772	0.027569	0.00351601	0	0.0455421	0	0	0.157237	0.019	0.232439	0.998586
GSM5608975	0	0.0403624	0	0.0911891	0	0.0831368	0.00612099	0	0.00726997	0	0.0675517	0	0.135761	0	0	0.00765472	0	0	0.0439929	0	0	0.516961	0	0.753836	0.659116
GSM5608976	0.0728787	0.0140472	0	0.153962	0	0	0.014875	0	0.0543946	0	0.0451678	0.0212061	0.0567794	0	0	0.0447371	0.0117789	0	0.0574273	0	0.0370919	0.415654	0	0.724322	0.701502
GSM5608977	0.0204948	0.0155572	0.00442901	0.0419619	0.0282299	0	0	0	0.059201	0	0.0365521	0	0.0955905	0.0434223	0	0.00775401	0	0	0.00880886	0	0	0.637998	0	0.743355	0.675504
GSM5608978	0	0.0466689	0.00197827	0.078523	0	0	0.0142847	0.0192511	0.00944032	0	0.0361812	0	0.105384	0	0	0	0.00742269	0.0110156	0.0185342	0	0	0.651316	0	0.811926	0.586424
GSM5608979	0.0356427	0.00508567	0.00209325	0.0307277	0	0.0410636	0.0243763	0	0.0239729	0	0.066323	0	0.0504595	0	0	0.00842433	0.00169274	0.00434388	0.0180286	0	0	0.687766	0	0.676759	0.759578
GSM5608980	0.0168299	0.054603	0	0.0788481	0	0.00647179	0.00775887	0	0.0665118	0	0.00396528	0.0249665	0.0321039	0	0	0.000259024	0.0091614	0.00861691	0.0456988	0	0	0.644205	0	0.810179	0.588682
GSM5608981	0.00817188	0.00153379	0.00551758	0.0349605	0.05165	0.043582	0.00557123	0	0.0328124	0	0.069466	0	0.173885	0	0	0.00436918	0	0	0.0291077	0	0	0.539372	0	0.768098	0.641328
GSM5608982	0.0222131	0	0.00820296	0.0353891	0.0216402	0	0.0600577	0.00438816	0	0.0108667	0.0688314	0	0.0615183	0.0637288	0.00353447	0.00982913	0	0.00189768	0.0224185	0	0	0.605484	0	0.702192	0.717284
GSM5608983	0.0238451	0.0131581	0.0245706	0.157888	0	0	0.0368263	0.0116751	0.0516427	0	0.0536909	0.00792376	0.198774	0.0377335	0.00399259	0	0	0	0.0326081	0	0	0.345671	0.06	0.134307	1.08326
GSM5608984	0.017893	0	0.0192769	0.416097	0	0	0.142865	0.0213299	0.038194	0	0.172474	0	0.0454429	0	0.00202858	0.0119296	0.00404691	0	0.0176782	0	0	0.090744	0.08	0.11871	1.08879
GSM5608985	0.0156713	0.0182473	0	0.14714	0	0	0.0421484	0	0.0256257	0	0.115943	0	0.0531093	0	0.00676956	0	0.000521728	0.0108809	0.0360888	0	0	0.527853	0	0.645741	0.766675
GSM5608986	0	0.052457	0.0336569	0.147108	0	0.00249096	0.0447582	0.0299721	0.0391944	0	0.106895	0.010397	0.125703	0.028951	0.00221432	0	0	0.00951097	0.0485633	0	0	0.318128	0.033	0.164047	1.0528
GSM5608987	0.00941998	0.0439367	0.0552254	0.335292	0	0	0.124465	0.0201589	0.0386015	0	0.146279	0	0.0464588	0.00930347	0.00652894	0.0227867	0.00862564	0	0.0272501	0	0	0.105668	0.034	0.161242	1.04294
GSM5608988	0	0.0750981	0.131584	0.23193	0	0.0503417	0.0699291	0.00762495	0.0304668	0.0343172	0.13529	0	0.0882605	0.011497	0	0.0166639	0	0	0.0315754	0	0	0.085421	0.009	0.282585	0.980504
GSM5608989	0.0140987	0.0439409	0.0317808	0.184395	0.00943541	0	0.00727246	0.0175224	0.101665	0	0.101053	0.0595818	0.0991433	0.00548286	0	0.00187165	0.00550255	0.00749274	0.0804264	0	0.0228849	0.20645	0.019	0.229702	1.00712
GSM5608990	0	0.0716151	0.0783088	0.334974	0	0	0.0515025	0.0137782	0.0632166	0	0.124667	0	0.0452982	0.0213063	0.00276377	0.0187688	0.0085334	0	0.0385945	0	0	0.126673	0.021	0.211446	1.01669
GSM5608991	0.0059061	0.0306569	0.0190645	0.378824	0	0	0.129138	0.0166626	0.0367616	0.00550151	0.0978186	0	0.0431914	0	0.0035569	0.0267809	0.00924965	0	0.0290643	0	0.00194287	0.165881	0.045	0.151179	1.0519
GSM5608992	0.0147962	0.0206833	0.00459951	0.0113259	0.00794271	0	0	0.0190825	0	0.0133276	0.038733	0	0	0.0181185	0	0.00818235	0	0.0124705	0.0234684	0	0	0.807269	0	0.712951	0.751042
GSM5608993	0.0218631	0.00524164	0	0.10262	0	0	0.0133389	0	0.0251281	0	0.0607802	0	0.110583	0	0	0.0302554	0	0.00586311	0.028289	0	0	0.596038	0	0.80432	0.596377
GSM5608994	0	0.090547	0.110744	0.16587	0	0	0.0889525	0.00797124	0.042661	0	0.087211	0	0.115515	0.0453682	0.00624965	0	0.0117323	0	0.0364216	0	0	0.190757	0.01	0.279707	0.975537
GSM5608995	0.0433768	0.0104155	0.0109114	0.0340071	0.01776	0	0	0.00415096	0.0387819	0	0.0309788	0.020703	0	0	0	0.0337041	0.00215366	0.00972871	0.0567773	0	0	0.686551	0	0.486307	0.943178
GSM5608996	0.0170299	0.0221031	0.00303304	0.064694	0	0	0.0621556	0.023634	0	0	0.0735493	0	0.0491788	0	0	0	0.00680562	0.0160487	0.033049	0	0	0.628719	0	0.778058	0.6301
GSM5608997	0.0302964	0.0119618	0.0105704	0.398186	0	0	0.109627	0.0282243	0.0689124	0	0.115827	0	0.0236541	0	0	0.0124948	0.00814442	0	0.0279544	0	0.00457774	0.149569	0.012	0.258307	1.00573
GSM5608998	0.0136193	0.0277718	0.019748	0.257935	0	0	0.0789002	0	0.0359694	0	0.145484	0	0.124773	0.0369805	0	0.00132619	0	0	0.0175793	0	0.0174219	0.222492	0.023	0.194971	1.02983
GSM5608999	0	0.0557202	0.0433344	0.0529464	0	0.00629912	0.00103728	0.00608211	0.0359291	0	0.0239853	0	0.0279977	0.00923064	0	0	0	0	0.0121959	0	0	0.725242	0.099	0.104646	1.26647
GSM5609000	0.0342301	0.0283708	0	0.121579	0	0	0.0408301	0	0.0677678	0	0.0294992	0.0214222	0.0566661	0	0	0	0.00670617	0	0.0511097	0	0	0.541819	0	0.77236	0.639731
GSM5609001	0.02288	0.0128117	0.00250614	0.121565	0	0	0.0606155	0.0113105	0.0395677	0	0.0709427	0	0.035577	0	0	0.00984347	0.0114487	0	0.0286384	0	0	0.572293	0	0.785811	0.622297
GSM5609002	0.0357572	0.0235797	0	0.118686	0	0	0.0190357	0	0.076058	0	0.0606662	0	0.0531586	0	0	0.0319679	0.00828931	0	0.0254126	0	0.0136386	0.53375	0	0.595097	0.811567
GSM5609003	0.0250081	0.0468074	0	0.0554743	0	0	0.00296443	0.025309	0.0550782	0	0.0355554	0.0233675	0	0.0223824	0	0	0	0	0.0401712	0	0	0.667882	0.01	0.267762	1.11169
GSM5609004	0	0.0106687	0.000789654	0.0801511	0.00305698	0	0.041855	0.00155804	0.0172228	0	0.175082	0	0.111974	0	0	0	0	0.00172269	0.0303016	0	0	0.525618	0	0.750004	0.663032
GSM5609005	0.0229831	0.0102532	0.00573013	0.0395761	0	0	0.0131557	0.000368716	0.0409361	0	0.0473687	0	0.00972021	0.0435105	0	0	0	0	0.0153284	0	0	0.751069	0	0.752343	0.681949
GSM5609006	0	0.0496007	0.106782	0.224992	0	0	0.137144	0.0191486	0.0436139	0	0.13979	0	0.0898199	0	0.00274745	0.00883142	0.0109016	0.00176409	0.032969	0	0.000721494	0.131173	0.016	0.237121	0.997572
GSM5609007	0	0.11714	0.165712	0.260756	0	0.163542	0.00814575	0.00661076	0.0164998	0	0.0899708	0	0.0533588	0	0	0.000782959	0	0	0.00711423	0	0	0.110368	0.006	0.343907	0.957577
GSM5609008	0	0.0854383	0.128003	0.192148	0	0.0151187	0.110329	0	0.0679988	0.0316023	0.0530803	0.000993791	0.085006	0	0.00689091	0.0209743	0.0149425	0.0022943	0.039636	0	0	0.145544	0.008	0.304591	0.963163
GSM5609009	0.0320021	0.0117933	0.0166703	0.173125	0	0	0.151366	0	0.0381791	0	0.15016	0	0	0	0	0	0.00057589	0.0117574	0.0268701	0	0	0.3875	0.008	0.316088	0.98488
GSM5609010	0.020908	0	0.0499011	0.452476	0	0	0.160847	0.0223607	0.0329606	0	0.127513	0	0.028778	0	0	0.0060596	0.00737557	0	0.0144044	0	0	0.0764164	0.031	0.168196	1.06072
GSM5609011	0.0319154	0.0378271	0.0109226	0.0731095	0	0	0	0.00199172	0.0840044	0	0.00250679	0.0300057	0	0.0227393	0	0	0	0	0.0397132	0	0	0.665264	0	0.684883	0.742781
GSM5609012	0.0442578	0	0.0505953	0.310669	0	0	0.153024	0.0294038	0.0341799	0.0141429	0.0748429	0	0.0278952	0	0	0.0256512	0	0	0.0272161	0	0	0.208122	0.034	0.160576	1.04224
GSM5609013	0	0.00633471	0.00092209	0.00765376	0	0.0227506	0.0258469	0	0.000325805	0	0.0515668	0	0.110325	0.0231633	0	0	0	0	0.0129312	0	0	0.73818	0	0.844133	0.547297
GSM5609014	0.0288762	0.0137574	0	0.0207704	0.00983817	0.0020915	0.00738406	0	0.0497713	0	0.0428849	0.00581248	0.171478	0	0	0	0.00054485	0.0113478	0.0343485	0	0	0.601095	0	0.790627	0.613916
GSM5609015	0.00301536	0.0123722	0.00447064	0	0.0242277	0	0.0135183	0.0255678	0	0.0226828	0.0412037	0	0.0260517	0	0	0	0.00386954	0.0122524	0	0	0	0.810768	0	0.799871	0.631667
GSM5609016	0.00177813	0.0511309	0.0133514	0.0294046	0	0	0.0387255	0	0.0424834	0	0.0170183	0.000594602	0.0904342	0.0198127	0	0	0	0.0132653	0.0389087	0	0	0.643092	0.005	0.354215	1.04502
GSM5609017	0.0262674	0	0.00599038	0.0981685	0	0.0371821	0.0192232	0	0.015027	0	0.0215603	0.00480584	0.0583188	0	0	0.00482959	0	0.00804694	0.0372771	0	0	0.663303	0	0.838311	0.547927
GSM5609018	0.019288	0.00301155	0.00546091	0.0555576	0	0	0.0225709	0.0326621	0	0	0.0330297	0	0	0.0528449	0.00208809	0.00220814	0	0	0.0283981	0	0	0.74288	0	0.682335	0.766337
GSM5609019	0	0.0178226	0.00493767	0.0429669	0	0	0.0257001	0.0165693	0	0.0152589	0.0216039	0	0.00706205	0.0454674	0.00207001	0.0137718	0	0.00358305	0.0228368	0	0	0.76035	0	0.806355	0.6069
GSM5609020	0	0.0188235	0.00186455	0.0677247	0	0.0443713	0.0233651	0	0.00330055	0	0.0825409	0	0.0937644	0	0	0.00289287	0	0.000456899	0.0296625	0	0.00690973	0.624323	0	0.81199	0.585673
GSM5609021	0.00201331	0	0.011294	0	0.031357	0	0.0181154	0.0169093	0	0.0183147	0.0645868	0	0	0.0524627	0	0	0	0.00964188	0	0.0130067	0	0.762298	0	0.685359	0.770758
GSM5609022	0.00374125	0	0.00597154	0.0660806	0	0.0162667	0.0369693	0	0.0166934	0	0.0626253	0	0.0889652	0.00712259	0	0	0	0.00795586	0.0471792	0	0	0.640429	0	0.787614	0.618715
GSM5609023	0.0169943	0	0.0128033	0	0.0230803	0	0.00677575	0.0107176	0.0202835	0	0.0593325	0	0.0276583	0.0380725	0	0	0	0.00283854	0.00303867	0	0	0.778405	0	0.665445	0.802393
GSM5609024	0.00852354	0	0.00747513	0.00300022	0.0140396	0	0.0220618	0.0286294	0	0.0140909	0.0463691	0	0	0.0552887	0.00207922	0	0	0.00780627	0.00260158	0	0	0.788035	0	0.659507	0.811008
GSM5609025	0.0201725	0	0.00542024	0.133978	0	0	0.0710891	0.0154964	0.013205	0	0.0880073	0	0.00462132	0.0200694	0	0	0	0.00304649	0.0177695	0	0	0.607125	0	0.699088	0.719528
GSM5609026	0.014979	0	0.00795328	0	0.027126	0	0.0163541	0.0208002	0	0.00840144	0.0426727	0	0.012715	0	0	0	0.00150462	0.0101995	0.0154423	0	0	0.821852	0	0.71925	0.748646
GSM5609027	0.0237332	0.00609767	0.00282545	0.0355502	0	0.0245782	0.0523541	0.0111078	0.0429514	0	0.0607852	0	0	0.0587705	0.0028784	0	0	0.00766006	0.01993	0	0	0.650778	0	0.648572	0.77858
GSM5609028	0.00388843	0	0.00189262	0.0339993	0.0670339	0	0.0251895	0	0.0360211	0	0.0712475	0	0.586603	0.0302016	0	0	0	0	0.0176458	0	0.00549441	0.120783	0	0.666591	0.749456
GSM5609029	0.0338645	0	0.0026446	0.101756	0	0.0315171	0.0469834	0	0.0190943	0	0.055745	0	0.0309809	0	0	0	0.00719054	0	0.0418268	0	0	0.628397	0	0.835188	0.554461
GSM5609030	0	0.0609135	0	0.122971	0	0	0.0119463	0.0224888	0.0400701	0	0.0131828	0.020095	0	0.0276129	0	0	0	0	0.0337593	0	0	0.646961	0	0.655319	0.770783
GSM5609031	0.0147639	0	0.00468114	0	0.0150378	0	0.0236794	0.0261178	0	0.0172829	0.0361853	0	0.00995658	0.00702943	0	0	0	0.007765	0.0305857	0	0	0.806915	0	0.804573	0.621079
GSM5609032	0.0120387	0.0025941	0.00587491	0.00087669	0.00649167	0	0.00353561	0.00221335	0.014838	0.0116753	0.0272408	0	0.211204	0	0	0	0.000362283	0.0117895	0.0235747	0	0	0.665691	0	0.838573	0.549974
GSM5609033	0	0	0.00157666	0.0830583	0	0	0.0673097	0.0236964	0	0.088918	0.0781228	0	0.0677994	0	0	0.0108424	0	0.000588961	0.0138427	0	0	0.564245	0	0.706766	0.710165
GSM5609034	0.00931395	0	0.00963429	0.0307508	0.0236708	0	0.0543386	0.00176757	0	0.0367832	0.0400905	0	0.0880115	0	0	0.0017229	0.000372338	0.00629396	0.0373058	0	0	0.659944	0	0.639081	0.795891
GSM5609035	0	0.00887656	0	0.202805	0	0.0491134	0.0287205	0	0.0224223	0	0.0696287	0.0156444	0.0899573	0.00125478	0	0.00417882	0	0	0.0256223	0	0	0.481776	0	0.73233	0.683848
GSM5609036	0.0174521	0.000402098	0.00493689	0.00734014	0	0.0210855	0.0146465	0	0.0313932	0	0.0521109	0	0.0794982	0.0370198	0.0010976	0	0	0	0.046217	0	0	0.6868	0	0.843608	0.540165
GSM5609037	0.0221963	0	0.00465152	0.0370951	0	0.0536472	0.0499232	0.00698383	0.0132369	0	0.0567599	0	0.094542	0	0	0	0.00414659	0.0145126	0.0161954	0	0	0.62611	0	0.785493	0.620718
GSM5609038	0.0290928	0	0.00685689	0.0978532	0.0263219	0	0.0161751	0.00934794	0.0411234	0.0286145	0.0122725	0	0	0	0	0.0165554	0.0205692	0	0.0339503	0	0	0.661267	0	0.856306	0.521347
GSM5609039	0.00436813	8.40331e-05	0.000561731	0.0244102	0.0627733	0.0337384	0.0361011	0	0.0169729	0	0.0430206	0	0.040883	0	0	0	0	0.00688058	0.0252599	0	0	0.704946	0	0.792236	0.617497
GSM5609040	0.00358661	0.030652	0.00198387	0.0127851	0.00515962	0	0.0134089	0.00386732	0.0254195	0.0117421	0.0345093	0	0	0.0686894	0.00449508	0	0	0	0.0055492	0	0	0.778152	0	0.533904	0.943914
GSM5609041	0.0155563	0	0.00471667	0	0.0336386	0	0.034493	0.0141517	0	0.0100036	0.0661904	0	0	0.0604083	0.000207745	0	0	0	0	0.00758079	0	0.753053	0.001	0.394826	1.05975
GSM5609042	0.04586	0	0.00529131	0.0908897	0	0.0169648	0.0391888	0	0.0376424	0	0.0512833	0	0.0448237	0.0181338	0	0.0102343	0	0	0.0406819	0	0	0.599006	0	0.735554	0.679325
GSM5609043	0	0.0641592	0	0.0667758	0.00414273	0	0.0488401	0.00558716	0.0472702	5.57734e-05	0.0199948	0.00437693	0.093851	0	0	0	0.00785429	0	0.0417193	0	0	0.595373	0	0.591222	0.826353
GSM5609044	0.0351409	0.024714	0.00267463	0.126182	0.00825137	0	0.0446456	0	0.076778	0	0.0469887	0.018227	0.10443	0	0	0	0.0096479	0	0.0465592	0	0.0183514	0.437409	0	0.625369	0.780368
GSM5609045	0.0348197	0.0574188	0.0190502	0.0751366	0	0.0402497	0.0946871	0	0.0124598	0	0.039013	0	0.121608	0	0	0	0.00382257	0.0110312	0.0510973	0	0	0.439606	0.013	0.251791	1.03408
GSM5609046	0	0.0104111	0.00907373	0.0834793	0	0	0.125462	0	0	0	0.0804796	0	0.0354448	0.0170311	0.000686997	0	0	0.00367442	0.0475476	0	0	0.586709	0	0.671505	0.745186
GSM5609047	0	0.0230743	0	0.0133269	0.0137185	0	0.0179165	0.0156017	0.016184	0	0.015157	0.00713742	0	0	0	0	0	0.0113278	0.0439045	0	0	0.822651	0	0.82146	0.597372
GSM5609048	0.00761096	0	0.000788973	0.0124408	0	0.0125003	0.0235083	0	0	0.00633585	0.0686979	0	0.195071	0.000646799	0	0.0101707	0	0	0.026377	0	0	0.635851	0	0.846629	0.534188
GSM5609049	0.0274634	0.00416203	0.00259224	0.0170715	0.00315549	0	0.0359006	0.0127147	0	0.00284194	0.04275	0	0.000223828	0	0	0.032506	0	0.0150443	0.030705	0	0	0.772869	0	0.76757	0.664772
GSM5609050	0.021168	0.0289945	0	0.0755985	0	0	0.0347565	0	0.0583136	0	0.0526566	0	0.0630398	0.0832136	0.000945358	0	0	0.00350668	0.0313627	0	0	0.546444	0.001	0.42449	0.95317
GSM5609051	0.000345755	0.0129735	0	0.065927	0	0	0.0471823	0.000249989	0.0113399	0	0.0282218	0.0197757	0.126958	0	0	0.0148481	0	0.00147836	0.0623929	0	0	0.608307	0	0.60659	0.818342
GSM5609052	0	0.0205849	0	0.0199847	0.00925576	0.0581613	0.0130385	0	0.0300554	0	0.0731615	0.000715089	0.166904	0	0	0	0	0.00601634	0.0312147	0	0	0.570908	0	0.824337	0.56944
GSM5609053	0	0.0395292	0.000984836	0	0.0148661	0	0.0209708	0.0194363	0	0.00885436	0.0112249	0	0.00587003	0	0	0	0	0.00712898	0.0284806	0	0	0.842654	0	0.813822	0.617481
GSM5609054	0	0.00587746	0.00167571	0.043715	0	0.0667625	0.0457415	0	0.00228208	0	0.0426814	0	0.273473	0	0	0.00816851	0	0.00151565	0.0271024	0	0	0.481005	0	0.832441	0.564209
GSM5609055	0	0.0490677	0	0	0.00810253	0	0.00652625	0.0196184	0	0.00930184	0.0229462	0	0	0.00910345	0	0.0070327	0	0.00912086	0.0182907	0	0	0.840889	0	0.762776	0.695645
GSM5609056	0.0230506	0	0.0129071	0.107921	0	0.177921	0.042804	0	0.0151751	0.0492999	0.0727145	0.00442242	0.0709614	0.0038468	0.000989797	0	0.00159066	0.00515789	0.0383857	0	0	0.372852	0.002	0.388791	0.940947
GSM5609057	0.0410109	0.00011121	0.00132606	0.00978327	0.0216133	0	0.053823	0.011998	0.0368552	0	0.0362827	0.00179484	0.0577164	0	0	0.0053064	0.00343715	0.0134196	0.040865	0	0	0.664657	0	0.756398	0.659878
GSM5609058	0.0345567	0	0.00240031	0.032994	0.00481944	0	0.00750543	0.0195694	0.018864	0	0.0136606	0	0	0.0547541	0	0.0161459	0	0	0.0177858	0	0	0.776944	0	0.584923	0.889576
GSM5609059	0.00535467	0.0148404	0.00314603	0	0.0259715	0	0.0207088	0.000595965	0.0139215	0.0114207	0.0538154	0	0	0.0474023	0	0.0188164	0	0.00914099	0.00510693	0	0	0.769758	0.007	0.335614	1.11922
GSM5609060	0.0248297	0.00686547	0.000560846	0.0328605	0	0.0585909	0.00866284	0.00064785	0.00773572	0	0.0102053	0	0.0721991	0	0.00474198	0	0	0.0270081	0.0422592	0	0	0.702832	0	0.779185	0.636912
GSM5609061	0.0271562	0.00893802	0.00589731	0.0262477	0	0	0.02326	0	0.0398692	0.00609411	0.0258042	0.00997863	0.115831	0.0510461	0	0	0	0.0112066	0.0477966	0	0	0.600874	0.009	0.287945	1.0821
GSM5609062	0.0221079	0	0.0053853	0.110201	0	0	0.0523484	0	0.0324995	0	0.114883	0	0.0901279	0	0	0.0117717	0.00494657	0.00336536	0.0412234	0	0	0.511139	0	0.651067	0.760784
GSM5609063	0.0172941	0.0256756	0	0	0.0168108	0	0	0.00772181	0.034204	0.0171949	0	0.00547796	0	0.0527153	0	0	0	0.00647542	0	0.0503544	0	0.766076	0	0.706663	0.74674
GSM5609064	0.00584407	0.0190603	0.0029737	0.016315	0.00709194	0	0	0.0193696	0.0431535	0	0.0406088	0	0.0386498	0.0106441	0	0	0	0.00350067	0.00661859	0	0	0.78617	0	0.855826	0.53247
GSM5609065	0.00431584	0.0364656	2.89653e-05	0	0.00761651	0	0.0244231	0.0145042	0	0.0129875	0.0455517	0	0	0	0	0	0.00428198	0.0165561	0.00234334	0	0	0.830925	0	0.772878	0.676616
GSM5609066	0	0.00053258	2.3254e-05	0.146169	0	0.0206074	0.0203557	0	0.0252356	0	0.235061	0	0.371645	0.0118572	0	0.000852435	0	0	0.0168187	0	0	0.150842	0	0.670148	0.750009
GSM5609067	0.0210375	0.00999158	0.0019089	0.0137182	0	0.0172741	0.00484245	0.0196738	0.0106691	0.00304628	0.0286915	0	0.0390839	0	0	0.013353	0	0.0137306	0.0211099	0	0	0.781869	0	0.808635	0.609944
GSM5609068	0.0269024	0	0.00419749	0.0221987	0	0.0111602	0.0241311	0.0234818	0	0.00283243	0.0382942	0	0	0	0	0	0	0.0137565	0.00416334	0	0	0.828882	0	0.836326	0.574929
GSM5609069	0.0343048	0.00787696	0.00167861	0.132344	0	0	0.07516	0.0042623	0	0	0.0651033	0	0.0222936	0	0	0	0.0125269	0	0.0308976	0	0	0.613552	0	0.806839	0.593954
GSM5609070	0.00718452	0.0154665	0.000631628	0.028042	0	0.0501428	0.00603544	0	0.0136564	0	0.0264852	0	0.0789666	0	0	0.00286475	0	0.0147222	0.00667411	0	0	0.749128	0	0.805937	0.608673
GSM5609071	0.0269413	0.0019149	0.00180196	0	0.0255861	0	0	0.00417364	0.00373263	0.0134863	0.01969	0	0.00892444	0.0535758	0	0	0	0	0.00312769	0	0	0.837045	0.002	0.388197	1.11741
GSM5609072	0.0565157	0.0205641	0	0.0367335	0	0.104113	0.0215496	0	0.0877427	0	0.0641715	0.0327709	0.159469	0	0.00237976	0.0384514	0.00694363	0.00461197	0.0482822	0	0	0.315702	0	0.633749	0.77912
GSM5609073	0.0190809	0.0437914	0	0.0127919	0.0292807	0	0.000718963	0	0.0284412	0.0109091	0.0188695	0	0.0771357	0.0476552	0	0	0	0	0.0240917	0	0	0.687234	0.007	0.319926	1.0976
GSM5609074	0.015199	0	0.00818065	0	0.0236861	0	0.0276161	0.00623547	0	0.0141092	0.047599	0	0	0.0114045	0	0	0	0.00430111	0.0305578	0	0	0.811111	0	0.476621	1.01237
GSM5609075	0.0284695	0.0393104	0.000218107	0.163099	0	0	0.00458498	0.0136916	0.0890291	0	0	0.0357816	0.0204279	0	0	0	0	0	0.0440996	0	0	0.561288	0.006	0.346011	1.01162
GSM5609076	0	0.00953511	0.00394334	0.138223	0	0	0.0866956	0.00254663	0	0	0.0708652	0	0.11438	0	0	0.00556051	0	0	0.0106539	0	0	0.557597	0	0.753718	0.658163
GSM5609077	0.0283748	0	0.00685196	0.00501957	0.0236035	0	0.025949	0.0341816	0	0.0143097	0.0551684	0	0	0.0507424	0	0	0	0.0132089	0.00315426	0	0	0.739436	0	0.547406	0.910602
GSM5609078	0	0.0275438	0.00145352	0	0.0211749	0	0.0254713	0	0.00358292	0.0105906	0.0193675	0.00189874	0.25846	0	0	0.00978833	0	0.00983912	0.0447291	0	0	0.5661	0	0.807243	0.590711
GSM5609079	0.026299	0.0267065	0	0.0719563	0.0231028	0	0.0510915	0	5.62507e-05	0.00654192	0.049782	0	0.0484518	0	0	0.0315846	0	0.00618211	0.0313353	0	0	0.62691	0	0.548989	0.870693
GSM5609080	0.0393967	0	0	0.0164515	0	0.112756	0.0398624	0	0.0101487	0	0.0648736	0	0.0290424	0	0	0.0107849	0	0.00883402	0	0	0	0.66785	0	0.814584	0.582736
GSM5609081	0.0348618	0	0.00306031	0	0.035263	0	0.00752079	0.0138789	0	0.0235143	0.0454546	0	0.045545	0.0473136	0	0.00525959	0	0	0.00635074	0	0	0.731977	0	0.733196	0.705635
GSM5609082	0	0.0122357	0.000665205	0.0209386	0.0273418	0	0.0221445	0	0.0251012	0	0.0594776	0.00161224	0.20272	0	0	0	0	0	0.0369745	0	0	0.590789	0	0.801199	0.599473
GSM5609083	0.0496189	0.026129	0	0.0292997	0.00495036	0.0139879	0.0276068	0	0.0643125	0	0.0268993	0.00690054	0.0737262	0	0	0.0132808	0.00585583	0.0135256	0.0416315	0	0	0.602275	0	0.828613	0.564574
GSM5609084	0	0.0149443	0.00247131	0.10352	0	0.0248662	0.0570187	0.00661219	0.0248569	0	0.0385183	0.0100884	0.104204	0	0	0	0	0	0.0432271	0	0	0.569673	0	0.780609	0.626821
GSM5609085	0	0.0310771	0.00311453	0.00722254	0.0134544	0	0	0.0100891	0.00705413	0.0043239	0.0439609	0	0	0.0552847	0	0.0267894	0	0	0.0215493	0	0	0.77608	0	0.666613	0.798659
GSM5609086	0.0233099	0	0.007835	0	0.0250155	0	0.0139939	0	0.00267121	0.0180294	0.0629347	0	0.0154556	0.0428123	0	0.0227367	0	0.0109617	0	0	0	0.754244	0.004	0.362514	1.09079
GSM5609087	0.00985349	0.0156736	0.0435128	0.251681	0	0	0.141491	0.0373174	0.0431007	0	0.157314	0	0.112574	0	0.00683218	0.0192002	0.00539332	0	0.037783	0	0	0.118274	0.041	0.155677	1.03832
GSM5609088	0.00882555	0.0347064	0	0.0718311	0	0.00699955	0.0535417	0	0.0354359	0	0.10207	0	0.156691	0	0.00546739	0	0.0039438	0.0137982	0.0285834	0	0	0.478106	0	0.752975	0.66282
GSM5609089	0	0.0634398	0	0.027741	0	0	0.028495	0.0287081	0	0.00661723	0.0424174	0	0.069726	0	0.00145957	0.0283248	0.000385191	0.0190078	0.0210265	0	0	0.662652	0	0.717271	0.708262
GSM5609090	0.00829948	0.0159643	0.00640252	0.0130684	0.0119032	0	0.0107242	0.0143789	0.00521825	0	0.0394245	0	0	0	0	0	0.00404614	0	0.0207859	0	0	0.849784	0	0.824619	0.602
GSM5609091	0	0.00625023	0.000649093	0.0556388	0	0.0300603	0.0426418	0	0	0	0.0821194	0	0	0	0	0.00573041	0	0.00092949	0.0158611	0	0	0.760119	0	0.833507	0.563255
GSM5609092	0.0130145	0.00246037	0.00514914	0.0124441	0.00666469	0	0.00978986	0.0257033	0.00263501	0	0.0440235	0	0.069245	0.0306098	0	0	0.00395046	0	0.0210674	0	0	0.753243	0	0.832956	0.566722
GSM5609093	0.0169324	0.0249058	0	0.00279359	0.00156566	0	0.015859	0.0233094	0.0093066	0.0131198	0.0262512	0	0.112305	0	0	0	0	0.0136322	0.0272477	0	0	0.712772	0	0.778115	0.643222
GSM5609094	0.0253585	0.0241524	0.029433	0.0189663	0.0103686	0	0.00891117	0	0.0442511	0.0130614	0.0107583	0.00445347	0	0.0663517	0	0	0	0	0.037442	0	0	0.706492	0.031	0.170235	1.20763
GSM5609095	0.0788954	0	0.00765165	0.019827	0	0.0215509	0	0.0101145	0.0508115	0	0.0307927	0.0188693	0.0661099	0	0	0	0	0.00932334	0.0202551	0	0	0.665799	0	0.752798	0.666186
GSM5609096	0.0169086	0	0.00656673	0.0331934	0.0225201	0	0.0259187	0.0108928	0.0146001	0.00623357	0.0507276	0	0.0481167	0.0605103	0	0.00933509	0	0	0.0190205	0	0	0.675456	0.001	0.450964	0.978951
GSM5609097	0.0369366	0.0163599	0.00170344	0	0.0229319	0	0.00696118	0	0.0187992	0.00235063	0.0540696	0	0	0	0	0	0	0.00629647	0.00206989	0	0	0.831521	0	0.822538	0.599926
GSM5609098	0.020102	0	0.0128668	0.0512172	0	0	0.0500396	0.00130187	0.0153298	0	0.0842716	0	0.0513413	0	0	0	0.00371055	0	0.0439886	0	0	0.665831	0.01	0.266209	1.11797
GSM5609099	0	0.00411132	4.25908e-05	0.0914423	0	0.0215384	0.0380014	0.00732958	0.00789983	0	0.244072	0	0.135109	0	0	0	0	0.00448589	0.000958092	0	0	0.44501	0	0.703005	0.712198
GSM5609100	0.00747745	0.000588648	0.00393328	0.0021129	0	0.0249758	0.0199711	0.00949332	0.00653737	0	0.0313583	0	0	0.045751	0	0.000808731	0	0.00764065	0.00661397	0	0	0.832737	0	0.799563	0.638689
GSM5609101	0.0131588	0.0105547	0.00732792	0.00352586	0.0344985	0	0	0.011114	0	0.00578449	0	0.0101319	0	0.0539561	0	0.00249182	0	0.00862756	0.0395889	0	0	0.799239	0.001	0.396229	1.08405
GSM5609102	0	0.00985102	0	0.0135882	0	0.026101	0.0401587	0	0	0.0267708	0.0533398	0	0.05794	0	0	0.00128297	0	0.0123521	0.00474858	0	0	0.753867	0	0.772832	0.657455
GSM5609103	0.0228445	0.00566042	0.00437476	0.0080062	0.0194582	0	0.019903	0.00658904	0.0128232	0	0.0615654	0	0	0.0688201	0	0	0	0	0.0174446	0	0	0.752511	0	0.837614	0.556063
GSM5609104	0.0220677	0	0.00449877	0	0	0	0.0105853	0.0236539	0	0.0133847	0.025746	0	0	0	0	0.0028542	0.00290407	0.0144979	0.0261705	0	0	0.853637	0	0.815023	0.619795
GSM5609105	5.14513e-05	0.0170195	0	0.0947592	0.057461	0.0102414	0	0	0.0500256	0	0.0539413	0.00563211	0.173058	0.0227972	0	0	0	0	0.0219652	0	0	0.493048	0	0.745983	0.667561
GSM5609106	0	0.0270598	0.000996212	0.0906896	0	0.0113596	0.0174795	0.0057586	0.0204246	0	0.060446	0	0.023508	0	0	0	0.00382769	0.0125246	0.0220158	0	0	0.70391	0	0.802873	0.602554
GSM5609107	0	0.00139673	0.00840682	0.0242085	0	0.00389584	0.0406936	0	0.0235377	0	0.0668365	0	0.290277	0.0126391	0.00150305	0	0	0.00735358	0.0283323	0	0	0.49092	0	0.738839	0.673923
GSM5609108	0.0260983	0.0202913	0.0047034	0.212501	0	0.0423645	0.025033	0	0.0588259	0	0.13474	0.00764946	0.174175	0.0161381	0	0	0.00314896	0	0.0384034	0	0	0.235928	0	0.588812	0.810376
GSM5609109	0.00173654	0.024654	0.00154993	0	0	0	0	0.0227188	0	0.020495	0.0358214	0	0	0	0.00263135	0	0	0.0667598	0	0.053822	0	0.769811	0	0.751798	0.687578
GSM5609110	0.00958169	0.0105059	0	0.0488475	0.0165003	0.0071862	0.0494429	0	0.0133834	0	0.0626527	0	0.118044	0	0	0.00528868	0	0.00894756	0.0240441	0	0	0.625575	0	0.826458	0.56492
GSM5609111	0	0.00515241	0.000532355	0.137035	0	0.0179501	0.00430768	0.00290487	0.0185136	0	0.0499301	0.0191132	0.0973971	0	0	0.00165334	0	0	0.0365308	0	0	0.608979	0	0.789732	0.615495
GSM5609112	0.0535825	0.00186128	0.0102021	0.0819053	0	0.0598222	0.0524191	0	0.036078	0	0.0858513	0	0.0821702	0	0	0	0.0027284	0.0112775	0.0274237	0	0	0.494678	0	0.562732	0.833684
GSM5609113	0	0.00445252	0	0.0150933	0	0.00702559	0.0338964	0	0	0	0.0584962	0	0	0	0	0.00533768	0	0.00448397	0.00924665	0	0	0.861968	0	0.799458	0.648515
GSM5609114	0.0262771	0.00588155	0.00365612	0.0152769	0	0	0.0640297	0.0237554	0	0.00512926	0.0654439	0	0	0.0275291	0	0	0	0.0154788	0.030613	0	0	0.716929	0	0.662509	0.779467
GSM5609115	0	0.0384832	0.00238946	0	0.0178451	0	0.0231707	0.0126318	0	0.0108845	0.046948	0	0	0	0	0.0197937	0	0.0123271	0.0166547	0	0	0.798872	0	0.77139	0.667419
GSM5609116	0.0410062	0	0.0131378	0.0364035	0	0.0729954	0.0127364	0.00111742	0.0435323	0	0.0382357	0.00138256	0.00802263	0	0	0	0.00472544	0.0139214	0.0291447	0	0	0.683638	0	0.7054	0.722679
GSM5609117	0.0205598	0	0.00808605	0.00466696	0.0273306	0	0.0716629	0	0.00696328	0.00537882	0.112292	0	0	0.0604495	0	0	0	0	0	0	0	0.68261	0	0.787989	0.620737
GSM5609118	0.0213242	0	0.00735855	0	0.018731	0	0.0319207	0.0196675	0	0.014051	0.0460162	0	0.0394078	0	0	0	0.00257966	0.0117448	0.0136163	0	0	0.773582	0	0.77987	0.65059
GSM5609119	0.0373008	0.00996014	0	0.122457	0	0	0.0547404	0	0.0257265	0.00109473	0.0668382	0	0.247002	0	0	0.0281117	0.00884466	0	0.0257829	0	0	0.372141	0	0.712088	0.708719
GSM5609120	0.0112444	0	0.00646847	0	0.0422141	0	0.00665164	0.00680511	0	0.0164462	0.0293127	0	0.0149365	0	0	0	0.000822988	0.0052137	0.0202354	0	0	0.839649	0	0.836821	0.579423
GSM5609121	0	0.0364283	0.00343293	0	0.0333907	0	0.0204416	0.00650521	0	0.00317382	0.0410999	0	0	0	0	0	0.00283724	0.0129029	0.0352566	0	0	0.804531	0	0.865883	0.514673
GSM5609122	0.0144438	0.00167692	0.00468317	0.0580008	0	0.0119606	0.0974972	0	0.0171937	0	0.057694	0	0	0.00498867	0	0.000397148	0.00120907	0	0.0456649	0	0.0189223	0.665668	0	0.807094	0.592474
GSM5609123	0.0373106	0.0259884	0	0.0507277	0	0.00261633	0	0	0.0541232	0	0.00517202	0.0335105	0	0.0318085	0.00311071	0	0	0.0048218	0	0.214252	0	0.536559	0	0.662562	0.753421
GSM5609124	0.0184881	0.0149447	0.00133199	0.00321344	0.00780033	0.011849	0.027625	0	0.0329913	0	0.0720969	0	0.121635	0	0	0	0.00139962	0.00863991	0.0241416	0	0	0.653843	0	0.754469	0.664203
GSM5609125	0.00430285	0.0237195	0	0.0266688	0	0.100807	0.0220494	0	0.0268538	0	0.120347	0	0.1036	0.0919826	0	0.000928011	0	0.0039425	0.023955	0	0	0.450844	0	0.6787	0.734956
GSM5609126	0.0231009	0	0.00565672	0	0.0361496	0	0.00645282	0.021206	0	0.0175039	0.067972	0	0	0.0605273	0	0.00224658	0	0.00229789	0	0.0304585	0	0.726428	0	0.671078	0.776454
GSM5609127	0.0650709	0	0.00828103	0.0745336	0	0	0.0663928	0	0.0299739	0	0.0925553	0	0	0.0622174	0	0.013622	0	0	0	0	0	0.587353	0	0.550689	0.858114
GSM5609128	0	0.0474182	0.00145643	0.00447057	0	0	0.0228851	0.0359602	0	0.00291065	0.0608154	0	0.0808746	0	0.0122446	0	0	0.0780769	0.0236478	0	0	0.62924	0	0.639326	0.787381
GSM5609129	0.0138829	0	0.00100608	0	0.0186121	0.0177813	0.0260065	0	0	0	0.037842	0	0.0358319	0	0	0.00511236	0	0.00474761	0.00819596	0	0	0.830981	0	0.819312	0.608046
GSM5609130	0	0.0420661	0.00074947	0	0	0.0991705	0.0105848	0.0269831	0	0	0.0523561	0	0.0208235	0	0.00524281	0	0	0.0651775	0	0	0	0.676846	0	0.638275	0.795812
GSM5609131	0.0211965	0	0.0137461	0	0.0107543	0	0.00613733	0.0202261	0	0.00694311	0.0226024	0	0	0.00716071	0	0.000460916	0.00143485	0.00984637	0.020771	0	0	0.85872	0	0.775174	0.68436
GSM5609132	0.340333	0	0.0201804	0.160119	0	0	0.0488791	0	0.0230996	0	0.080889	0	0	0	0.000929171	0.000645334	0	0.00545157	0	0	0	0.319473	0	0.497313	0.872728
GSM5609133	0.00554505	0	0.0116539	0.0260502	0	0.00536212	0.0313788	0.0069762	0	0	0.044701	0	0	0.0369643	0	0.0154583	0	0	0.0344355	0	0	0.781475	0	0.791688	0.633381
GSM5609134	0	0.0404959	0	0.0584268	0	0.277692	0.0337408	0	0	0	0.0733234	0	0.108655	0	0	0.00464287	0	0	0.0319541	0	0	0.37107	0	0.723942	0.70368
GSM5609135	0.00267381	0.00407257	0.00791658	0.00186875	0	0.120563	0.0388067	0	0.0068825	0	0.121115	0	0.0870588	0	0.000840091	0.00803464	0.00270803	0.0125621	0	0	0	0.584897	0	0.660963	0.75862
GSM5609136	0.0139363	0.00300992	0.0247092	0.0121136	0	0.0587529	0.0452409	0	0.0288942	0	0.0589648	0	0.00724212	0	0	0.000250394	0	0.0100671	0.0304857	0	0	0.706333	0.001	0.395448	1.02878
GSM5609137	0	0.031218	0.0079883	0.10925	0	0.151632	0.052545	0	0	0	0.0727406	0.00632131	0.276583	0	0	0.00905987	0	0.00205561	0.0560221	0	0	0.224585	0.001	0.448001	0.895253
GSM5609138	0.0386905	0	0.00684878	0.0316654	0	0.0472124	0.0581833	0	0	0.00123147	0.0804762	0	0.00540987	0	0	0	0.00331666	0.0155578	0.00651404	0	0	0.704894	0	0.752305	0.669947
GSM5609139	0.009285	0.0172758	0.00137311	0.00644097	0.0123655	0.128948	0.0418171	0	0	0	0.0817232	0	0	0	0.000153053	0	0	0.0196812	0	0.012971	0	0.667966	0	0.714362	0.709594
GSM5609140	0.00927713	0	0.00453925	0.00970003	0	0.041488	0.0302781	0.000106	0	0	0.0552203	0	0.0482316	0	0	0.0173112	0	0.0106119	0.00338208	0	0	0.769854	0	0.811688	0.602763
GSM5609141	0.0153312	0.000476729	0.00507759	0.0328272	0	0.0282531	0.00226092	0.00220756	0.0133685	0	0.0600209	0	0	0	0	0.00190289	0.00132832	0.00944083	0.0157739	0	0	0.811731	0	0.805947	0.62012
GSM5609142	0.0317354	0	0.0246854	0.037873	0.0190949	0.0393489	0.0448578	0	0	0	0.0474792	0	0.0884572	0	0	0.0248922	0	0.0108057	0.0223872	0	0	0.608383	0	0.589153	0.831209
GSM5609143	0.0264874	0	0.0083415	0	0	0	0.0105307	0.0260488	0	0.0102582	0.0357102	0	0	0.0452371	0	0.0178602	0	0.00861477	0.00709605	0	0	0.803815	0	0.791508	0.64173
GSM5609144	0	0.0214576	0	0.0167796	0	0.0784266	0.0366563	0	0	0	0.0684056	0	0.0194703	0	0	0.0156906	0	0.00170472	0.0176653	0	0	0.723743	0	0.753335	0.67308
GSM5609145	0	0.0442348	0	0.00207194	0	0.0610522	0.036537	0.011751	0	0	0.078884	0	0.0264479	0	0.000646678	0.00429086	0	0.053665	5.21662e-05	0	0	0.680367	0	0.690576	0.740245
GSM5609146	0.0557905	0.0159137	0.0137328	0.0847676	0	0.0567319	0.0454972	0	0.00118055	0	0.156893	0	0.127599	0	0	0.000955611	0	0.00206355	0.00915272	0	0	0.429721	0	0.578234	0.818173
GSM5609147	0.0161626	0	0.00831027	0	0.00256747	0	0.0155215	0.0184024	0	0.00235203	0.0505053	0	0.0647535	0	0	0.00384232	0.000143529	0.0128635	0.0175273	0	0	0.787048	0	0.80926	0.612727
GSM5609148	0	0.0144071	0.00529322	0	0.0374497	0	0.00473228	0.0163589	0	0.0218958	0.0383674	0	0	0.0109269	0	0	0	0.0113606	0	0.0211807	0	0.818027	0	0.752787	0.701746
GSM5609149	0.0140534	0.00388032	0.00351814	0.0153475	0	0.0344472	0.035134	0.010587	0	0	0.0701796	0	0	0	0	0	0.000910623	0.0108407	0.00629258	0	0	0.794809	0	0.799204	0.624936
GSM5609150	0.0258543	0.0123221	0.00117208	0	0.00263446	0	0.0143485	0	0	0.00304792	0.0641247	0	0.0194458	0.0603365	0.00285559	0	0	0.0111289	0	0.113132	0	0.669597	0	0.583486	0.85627
GSM5609151	0	0.0150272	0.00605298	0.28182	0	0	0.0582066	0	0.0345316	0	0.192751	0.0326795	0.189957	0.0187978	0.00480283	0.018906	0.0168408	0	0.0775223	0	0.00169177	0.0504117	0	0.491002	0.870451
GSM5609152	0.0171329	0.0174576	0	0.0735164	0	0	0.0413059	0	0.0211984	0	0.132366	0	0.144241	0	0.000189817	0	0.00181717	0.0127305	0.0308933	0	0	0.507151	0	0.716459	0.698418
GSM5609153	0.00135305	0.00220295	0.000644526	0.0451644	0	0.0532293	0.0395532	0	0	0	0.0538533	0	0.143511	0	0	0.00864606	0	0.00336566	0.0205088	0	0	0.627968	0	0.748479	0.66891
GSM5609154	0.0021598	0.0326518	0	0.0237105	0	0	0.0600357	0.0147638	0	0.0110159	0.0436256	0	0	0	0	0.00132056	0.00321013	0.013048	0.0312779	0	0	0.76318	0	0.729581	0.712018
GSM5609155	0	0.00375382	0	0.118819	0.130386	0.228499	0.015063	0	0.00122372	0	0.061488	0	0.325751	0	0	0.00327484	0	0.000827371	0.0111175	0	0	0.0997968	0	0.577858	0.818313
GSM5609156	0.0717388	0	0	0.108945	0	0.0681684	0.0415491	0	0.0127857	0	0.095023	0	0.0539315	0	0	0.00331554	0.00159466	0.00849095	0.0261851	0	0	0.508272	0	0.725815	0.690427
GSM5609157	0	0.0382422	0.000576701	0.00863791	0	0	0.0217513	0.0363506	0	0.00888052	0.0548145	0	0.0130366	0	0	0	0	0.0655731	0.00594208	0	0	0.746194	0	0.685338	0.763413
GSM5609158	0.112127	0	0.0103049	0.0927253	0	0	0.0627457	0	0.0405863	0	0.0704409	0	0.0178221	0.0668156	0	0.00145686	0	0.00979859	0.0298765	0	0	0.4853	0.001	0.465875	0.903415
GSM5609159	0.00666228	0.0225161	0.000991815	0.0395882	0	0.0148728	0.0520504	0.0072451	0.00993865	0	0.0980536	0	0	0	0.00185688	0	0.00397595	0.0138031	0	0	0	0.728445	0	0.74418	0.685594
GSM5609160	0.013793	0.00180377	0.00508998	0.0300474	0	0.0726122	0.0260652	0	0	0	0.0495237	0	0.0338101	0.0107435	0	0	0	0.0082448	0.0196273	0	0	0.728639	0	0.817986	0.583417
GSM5609161	0	0.0294877	0.00492652	0.0414664	0	0	0.07691	0.0159505	0	0	0.0686979	0	0.0545084	0	0	0	0.00532367	0.011142	0.0156458	0	0	0.675941	0	0.779436	0.631599
GSM5609162	0.00125502	0	0.00254386	0.195975	0	0	0.0623926	0	0	0.0744801	0.151999	0	0.0374152	0	0	0.00411425	0	0.000398041	0.00263759	0	0	0.466789	0	0.745872	0.670034
GSM5609163	0.00068543	0.00741044	0.00360094	0.0551396	0.0664445	0.0960429	0.0336754	0	0	0	0.0970433	0	0.0152255	0	0	0.00684174	0	0	0	0	0	0.61789	0	0.703272	0.716589
GSM5609164	0.0328452	0	0.00266838	0	0.0404425	0	0.0166098	0.00340742	0	0.0147347	0.0465374	0	0	0.0439307	0	0	0	0.0100105	0	0.0173357	0	0.771478	0	0.756723	0.681763
GSM5609165	0	0.00492252	0	0.182149	0	0.0459873	0.0625759	0	0.0230867	0	0.179048	0	0.100556	0	0.000748754	0	0	0.00162659	0.0441609	0	0	0.355138	0	0.701595	0.720542
GSM5609166	0	0.0269316	0.00171671	0	0.0214395	0.0322509	0.0667144	0	0	0.0207101	0.0793316	0	0.0462257	0	0	0.00517828	0	0.00522864	0.0198294	0	0	0.674443	0	0.737374	0.685124
GSM5609167	0	0.0342603	0.00520814	0	0.00425428	0.00306172	0.0113571	0.0237325	0	0	0.0519101	0	0	0	0.00103303	0	0.00331995	0.0123755	0	0	0	0.849487	0	0.737093	0.734933
GSM5609168	0	0.0122753	0.00832795	0.00247895	0.018463	0	0.0492786	0.017622	0	0.0118448	0.0431609	0	0	0	0	0.0107232	0.00258913	0.00496832	0.00604997	0	0	0.812218	0	0.537492	0.95158
GSM5609169	0.0131264	0.0561065	0.00234793	0.203464	0	0.102056	0.0509526	0	0.00187613	0.066215	0.123255	0	0.230367	0	0	0.00779044	0	0	0.0415912	0	0	0.100852	0	0.627956	0.789277
GSM5609170	0.0544338	0	0.0057508	0.0259017	0.0225051	0	0.0504046	0	0.031881	0.00057848	0.0639421	0	0.0667814	0.104548	0	0	0	0.00560011	0.0227049	0	0.0447107	0.500257	0.007	0.325018	1.01219
GSM5609171	0	0.0218356	0.00461856	0	0.00501809	0	0.0188488	0.0149808	0	0.0138556	0.0352309	0	0	0	0.00650636	0	0.00278553	0.0242289	0.0266599	0	0.0386908	0.78674	0	0.688906	0.77449
GSM5609172	0.00486428	0.000158728	0	0	0.041716	0	0.0340773	0	0.00574756	0.00930331	0.0196056	0	0.190275	0.0596493	0	0	0	0	0.0385336	0	0	0.596069	0	0.51893	0.906789
GSM5609173	0	0.019049	0.00686242	0.113182	0	0	0.0520287	0	0.0165095	0	0.0966812	0	0.0155526	0	0	0.0256879	0.00202307	0.0121026	0.00901722	0	0	0.631304	0	0.758737	0.654344
GSM5609174	0	0.0504061	0	0.1084	0	0	0.00970507	0.00187489	0.0397734	0	0.0482761	0	0.0561843	0	0.000961215	0	0.0104834	0.0127541	0.0291169	0	0	0.632064	0	0.787183	0.619034
GSM5609175	0	0.0267956	0.00591536	0.00758661	0.00522555	0	0.0414637	0.00735339	0	0.0363287	0.0595018	0	0.0220657	0	0.00316373	0	0.00351365	0.0127798	0	0	0	0.768306	0	0.727163	0.720598
GSM5609176	0.0123205	0.0310348	0	0.0129172	0	0.050457	0.0493119	0	0.00297525	0	0.0439383	0	0.0799379	0	0	0.0171948	0	0.00563238	0.0141625	0	0	0.680117	0	0.767168	0.649452
GSM5609177	0	0.0184692	0	0.102905	0	0.0558209	0.0200974	0	0	0.0142597	0.0669735	0	0.135422	0	0	0.0121496	0	0	0.0167031	0	0	0.5572	0	0.829345	0.565077
GSM5609178	0.0337836	0	0.0102387	0.0588784	0	0.00957577	0.0506191	0.00241464	0	0.00801752	0.0717977	0	0.0333065	0	0	0.033559	0.00293444	0.0130085	0.0331758	0	0	0.63869	0	0.584752	0.839877
GSM5609179	0.0138366	0	0.0058389	0.000851012	0.0178674	0	0.0119228	0.0260782	0	0.00520775	0.0474756	0	0	0.0483382	0	0.0202214	0	0.00544411	0.0163519	0	0	0.780566	0	0.741006	0.705876
GSM5609180	0	0.0129321	0	0.0373618	0.0103485	0.0328744	0.028684	0	0	0	0.114955	0	0.0484706	0	0	0.00566142	0	0	0.0318483	0	0	0.676863	0	0.837153	0.550096
GSM5609181	0	0.0158789	0.00741589	0.00501349	0.03181	0.00796365	0.0394646	0	0	0.00475452	0.0479553	0	0.122075	0	0	0.0342819	0.00197534	0.00630083	0.0300896	0	0	0.645021	0	0.735806	0.685815
GSM5609182	0.0203691	0.0127926	0.00142725	0	0.0137683	0	0	0.0147628	0	0.0235951	0.0503456	0	0	0.0565232	0	0	0	0.0105446	0	0.0709075	0	0.724964	0	0.689677	0.755426
GSM5609183	0	0.00696833	0.00392039	0.010093	0	0	0.04151	0	0	0.0481798	0.086729	0	0.28965	0	0	0.0345448	0	0	0.0356045	0	0	0.442801	0	0.750691	0.661929
GSM5609184	0.0202669	0	0.00908749	0.0274657	0.000942757	0	0.0363435	0.00866488	0	0.00578503	0.0549565	0	0	0	0	0.0156003	0.00578897	0.0099715	0.00825652	0	0	0.79687	0	0.799657	0.625009
GSM5609185	0.0177668	0	0.0118961	0.0431133	0.0316865	0	0.0363174	0	0.00369842	0.00864761	0.0514507	0	0.145826	0.0900788	0.00225113	0.0105348	0	0	0.04413	0	0	0.502602	0.002	0.376883	0.983532
GSM5609186	0.154032	0	0	0.107799	0	0	0.0956076	0	0.0279803	0	0.120465	0	0	0.0582487	0	0	0	0.0121659	0.0121785	0	0	0.411523	0.002	0.388915	0.942986
GSM5609187	0.0201714	0.0303405	0	0.0400954	0	0.0644799	0.0563163	0	0	0.00313408	0.0660963	0	0	0	0	0.00728755	0.00477501	0.0142726	0.000721713	0	0	0.692309	0	0.759829	0.657963
GSM5609188	0.00629613	0	0.0114988	0.0947853	0	0	0.0631227	0.021553	0.0270025	0.00435018	0.0677009	0	0.00177419	0	0	0	0.00874222	0.0117684	0.0169169	0	0	0.664489	0	0.75285	0.663419
GSM5609189	0.0103721	0	0.00790423	0.0236119	0.00727015	0.0507023	0.0357366	0	0	0	0.0405896	0	0	0	0	0.0291496	0	0.00595369	0.0228917	0	0	0.765818	0	0.844135	0.545711
GSM5609190	0	0.0372971	0.00552316	0	0.0185408	0	0.0103929	0.0176228	0	0.0143952	0.0460827	0	0.0149843	0	0	0	0.00344302	0.0140147	0.00842337	0	0	0.80928	0	0.622165	0.86206
GSM5609191	0	0.0192004	0.0053456	0.00883231	0	0	0.0298146	0.0102353	0.00511648	0.00108463	0.0318871	0	0.0106228	0	0	0.0271179	0	0.00906942	0.0358089	0	0	0.805865	0	0.837613	0.566572
GSM5609192	0.0145744	0	0.0115691	0.00777584	0.02148	0.019001	0.0211789	0	0	0.00520973	0.0738841	0	0	0.051892	0	0.00365667	0	0.00421915	0	0.0123518	0	0.753207	0	0.804148	0.60901
GSM5609193	0.0377768	0	0.00420346	0.0379211	0	0.00132811	0.0567348	0.000846817	0	0	0.128896	0	0	0	0.00299614	0	0.00692383	0.0155346	0.0180817	0	0	0.688756	0	0.759192	0.659421
GSM5609194	0.00679689	0	0.00703854	0.0137546	0	0.0587591	0.0255708	0	0	0	0.0543076	0	0	0	0	0.0274096	0	0.0102939	0.00701009	0	0	0.789059	0	0.842583	0.553566
GSM5609195	0.00620321	0.0120183	0.00406199	0	0.0122122	0	0.0253894	0.0220526	0	0.00282143	0.0548031	0	0	0	0	0.0162302	0.00359625	0.0138133	0.0297459	0	0	0.797052	0	0.77292	0.664339
GSM5609196	0	0.002238	0.00950191	0	0.0225501	0	0.0267618	0.0143189	0	0.0248788	0.0413318	0	0.0706363	0	0	0	0	0.0131602	0.00125007	0	0	0.773372	0	0.732811	0.719445
GSM5609197	0.0185579	0.00367732	0.00536109	0.0680854	0	0.168144	0.0924826	0	0	0	0.193508	0	0.0764443	0	0	0.024379	0	0.0085087	0.015662	0	0	0.32519	0	0.597854	0.802117
GSM5609198	0.0146109	0	0.0130188	0	0.0285272	0	0.0155684	0.0167886	0	0.00935924	0.0371111	0	0.0991479	0.0351524	0	0.0212054	0	0	0.0274101	0	0	0.6821	0	0.699792	0.736637
GSM5609199	0.0196993	0.00956862	0.0029937	0	0.00263003	0	0.0140344	0.029926	0	0.0120676	0.0406352	0	0	0	0.0010877	0	0.00306507	0.0214143	0	0	0.0170285	0.82585	0	0.752976	0.704445
GSM5609200	0.019386	0	0.00826223	0	0.0177837	0	0.0160341	0.0266565	0	0.0175604	0.0430304	0	0	0.0487585	0	0.0149404	0	0.00919891	0	0.0297384	0	0.74865	0	0.751529	0.682603
GSM5609201	0.0121806	0	0.0108731	0	0.0399472	0	0.0141931	0.0154164	0	0.0215146	0.0527362	0	0.0295248	0	0	0.00458393	0.00162809	0	0	0	0	0.797402	0	0.761529	0.684457
GSM5609202	0.0248835	0	0.0159772	0.010067	0	0	0.0595199	0.00578699	0.0334187	0	0.0554513	0	0.0144256	0	0	0	0.00369944	0.014029	0.0428018	0	0	0.71994	0	0.504059	0.940697
GSM5609203	0.0135608	0.00166843	0.00441074	0	0.0166971	0	0.0221789	0.025595	0	0.0313596	0.052497	0	0	0.0290414	0	0	0	0.0118602	0	0.001078	0	0.790053	0	0.763473	0.677653
GSM5609204	0.0177834	0.026813	0	0.0110046	0	0.0488536	0.0382849	0.00644259	0	0	0.0778592	0	0	0	0.00216033	0	0	0.0141918	0	0.0305857	0	0.726021	0	0.726832	0.706672
GSM5609205	0.041708	0	0.00819796	0.120394	0	0.217108	0.0551921	0	0	0	0.052802	0	0.126958	0.00214956	0	0.00529873	0	0	0.000160102	0	0	0.370032	0	0.700757	0.721721
GSM5609206	0.0229998	0	0.0146669	0.0444121	0	0.0502388	0.0849456	0	0.0251103	0.0057736	0.120799	0	0	0.0355537	0.00309318	0	0	0.0017208	0.0163792	0	0	0.574307	0	0.752679	0.660098
GSM5609207	0.00781733	0.00112649	0	0.0412528	0	0.181104	0.0597262	0	0	0	0.207992	0	0.235627	0	0	0.0205589	0	0.000587628	0.036323	0	0.0052306	0.202654	0	0.67422	0.754195
GSM5609208	0	0.0199671	0.00945709	0	0.0257309	0	0.0513195	0	0	0.0131879	0.0430078	0	0.110489	0	0	0	0.000774069	0.00900125	0.0295864	0	0	0.687479	0	0.514395	0.931361
GSM5609209	0.0195115	0.00241161	0.00487436	0.0636205	0.0537585	0.132534	0.0338857	0	0	0	0.083926	0	0	0	0	0.0192016	0	0.010586	0	0	0	0.57569	0	0.847911	0.543938
GSM5609210	0.0484366	0.00902682	0	0.00369037	0	0.0445232	0.0239632	0.00544796	0.00810894	0.00852041	0.0651451	0	0	0	0	0.0352662	0.00121076	0.0122744	0.0142191	0	0	0.720167	0	0.732926	0.69782
GSM5609211	0.000211495	0.0166878	0.00349115	0.035621	0.0258652	0.0468932	0	0	0.0306397	0	0.0273013	0	0.12636	0	0.00990007	0.0307267	0.000208675	0.0126298	0.0150214	0	0	0.618443	0	0.716073	0.705653
GSM5609251	0.0148629	0.0116555	0.0193466	0.00303838	0.00638407	0	0.041429	0.006043	0	0.0236013	0.0628967	0	0	0	0	0	0.00263742	0.0125697	0.0165642	0	0	0.778971	0	0.499375	0.97273
GSM5609252	0	0.0335921	0.00428131	0.0113767	0.024445	0	0.0345764	0.00876977	0	0.00172145	0.0419667	0	0.0554566	0.0121508	0	0	0	0	0.0388091	0	0	0.732854	0	0.88182	0.475736
GSM5609253	0.0381865	0	0.00909882	0	0.0365584	0	0.00212792	0.00700659	0	0.00731371	0.0543897	0	0.0109656	0.050177	0	0	0	0	0	0	0	0.784176	0	0.508204	0.973144
GSM5609254	0.0169292	0	0.00327838	0	0.0403062	0	0.00416177	0.00603797	0	0.00301189	0.0491891	0	0	0.0311626	0	0.0139997	0	0.0086069	0.00321723	0	0	0.820099	0	0.844607	0.55976
GSM5609255	0.0197155	0	0.00650645	0.00755279	0.032254	0	0.0144988	0.00551543	0	0	0.0414503	0	0	0.0423799	0	0	0	0	0.0218626	0	0	0.808264	0	0.701087	0.767416
GSM5609256	0.0120466	0.00615118	0.0103944	0	0.0463587	0	0.0169874	0	0	0.00369547	0.0551928	0	0	0.0488559	0	0	0	0.00913762	0.00596228	0	0	0.785218	0	0.8184	0.593932
GSM5609257	0	0.0215654	0.000638837	0	0	0.0273207	0.0128785	0	0.0201835	0	0.0068426	0.00187559	0	0	0	0.00616721	0	0.00296984	0.0240843	0	0	0.875474	0	0.564488	0.958031
GSM5609258	0.0678306	0	0	0.0603126	0.00090774	0.0633729	0	0	0.0366032	0	0.0189546	0.0122006	0.0273101	0	0	0	0	0.00763135	0.0508847	0	0	0.653992	0	0.824972	0.568071
GSM5609259	0.0227186	0	0.00736349	0	0.0313042	0	0.000268393	0.0114182	0	0.00689449	0.0562991	0	0	0.0474831	0	0	0	0	0	0	0	0.81625	0.009	0.297292	1.1803
GSM5609260	0.0435743	0.00821258	0.00394737	0.0585957	0	0.0389239	0.0478532	0	0	0	0.1243	0	0	0	0.000765251	0	0.00105978	0.0100111	0.0181321	0	0	0.644625	0	0.58009	0.84512
GSM5609261	0.0334343	0.00829722	0	0	0.0237109	0.0197973	0	0.00111946	0.0324837	0	0.0358003	0	0	0	0	0	0.00023524	0	0.0317808	0	0	0.813341	0	0.833708	0.574821
GSM5609262	0.0499298	0	0.00290337	0	0.0275996	0	0.00277478	0.00221753	0	0.00326708	0.0562147	0	0	0.0492645	0	0	0	0.00216662	0	0	0	0.803662	0	0.684895	0.787469
GSM5609263	0.0333357	0	0.00392617	0	0.0335825	0	0	0	0	0.00315156	0.0589144	0	0	0.0556705	0	0.0116725	0	0	0.0116976	0	0	0.788049	0	0.776605	0.659617
GSM5609264	0.0253822	0	0.00555707	0	0.0257266	0	0.000493087	0.0125346	0	0.00968059	0.0530421	0	0	0.056223	0	0	0	0	0	0	0	0.811361	0.006	0.34766	1.13536
GSM5609265	0.00331891	0.00721838	0.00588043	0	0.0167318	0	0.013343	0.0218407	0	0.00980172	0.0284595	0	0	0	0	0	0	0.00818874	0.0248829	0	0	0.860334	0	0.866252	0.530802
GSM5609266	0.010283	0.000527401	0.011034	0.024816	0	0.0595999	0.0327283	0.0038028	0	0	0.0445487	0	0	0	0	0.018035	0.014748	0.01089	0.0463061	0	0	0.722681	0	0.812077	0.589688
GSM5609267	0.0010824	0.00601058	0.00397738	0	0.0149879	0	0.00919305	0	0.00130426	0.0130728	0.0330593	0	0	0.0391661	0	0	0	0.00427162	0.0173545	0	0	0.85652	0	0.827109	0.603094
GSM5609268	0.057187	0.00699617	0.000689725	0.0121136	0.0316311	0	0.00601201	0	0.00114903	0.00852563	0.0456773	0	0.155017	0.135858	0	0	0	0	0.0357724	0	0	0.50337	0.005	0.351947	1.00778
GSM5609269	0	0.00460418	0.00235673	0.0344072	0	0.0454969	0.0659959	0	0	0	0.141332	0	0.142689	0	0	0.00515966	0	0.00173394	0.020923	0	0	0.535302	0	0.721765	0.69298
GSM5609270	0.015439	0.00489821	0.00651787	0.00937161	0.0277017	0	0	0.003735	0	0.00610689	0.0447384	0	0.0225119	0.053725	0	0.00510907	0	0	0.014441	0	0	0.785704	0	0.790437	0.640016
GSM5609271	0.0270699	0	0.00364989	0	0.0319967	0	0.00122333	0.0135739	0	0.0116033	0.0613347	0	0	0.0520138	0	0	0	0.00187576	0	0	0	0.795659	0	0.625828	0.85395
GSM5609272	0.0419067	0	0.0061122	0	0.0858231	0	0.00184362	0	0	0	0.0706858	0	0.00525059	0.0607805	0.00212818	0	0	0	0	0	0	0.725469	0.004	0.367716	1.06923
GSM5609273	0	0.0358493	0.00225875	0	0.00568311	0	0	0.00347681	0.001811	0.00815592	0.0286053	0	0.0349807	0.0554466	0	0	0	0	0.0145284	0	0	0.809204	0	0.66491	0.819198
GSM5609274	0.016005	0	0	0	0.00947624	0.060247	0.010115	0	0	0	0.0289863	0	0.00695786	0	0	0.00563617	0	0.00231522	0.0238226	0	0	0.836439	0	0.85972	0.535905
GSM5609275	0.0136371	0	0.00452545	0.0419868	0	0.0420574	0	0	0	0	0.136258	0	0	0.0632029	0.00233054	0	0	0	0	0.0851692	0	0.610833	0	0.593896	0.828496
GSM5609276	0.0100309	0	0.0172278	0.00914397	0.00585685	0.0246682	0.0296656	0	0.0109877	0	0.0519211	0	0	0.00969868	0.00025814	0	0	0	0.0307781	0	0	0.799763	0.013	0.25522	1.19774
GSM5609277	0.00789219	0.00711863	0.00482134	0	0	0.0285243	0.0178636	0.0058939	0	0	0.0711039	0	0	0.00825759	0	0	0	0.0119636	0.0335321	0	0	0.803029	0	0.775121	0.663579
GSM5609278	0.0596205	0	0.00153756	0.00579712	0.00503477	0.0248476	0.0142113	0	0.00945338	0	0.0433238	0	0.0596552	0.0280884	0	0.0130503	0	0.000922977	0.0124037	0	0	0.722053	0	0.726168	0.711933
GSM5609279	0	0.0493891	0.000832155	0.0339185	0.0299368	0	0.00330229	0	0.0176368	0	0.0420291	0	0	0.0128503	0	0.00712328	0.00119096	0	0.0384209	0	0	0.76337	0	0.882794	0.476099
GSM5609280	0.0261928	0.0023505	0	0	0	0.0368094	0.0151465	0	0.0235735	0	0.0370422	0	0	0.018631	0	0.00549825	0	0	0.0215834	0	0	0.813172	0	0.829918	0.581689
GSM5609281	0.0208041	0.018135	0	0.077841	0.0650933	0.114398	0.0115854	0	0.0337095	0	0.0336815	0.00885765	0.0881468	0	0	0.0105451	0	0.000550613	0.0321718	0	0	0.48448	0	0.843888	0.564796
GSM5609282	0.0333418	0	0.00704786	0	0.0287195	0	0.000129443	0.00443797	0	0.00698002	0.0673648	0	0	0.0533755	0	0.00187648	0	0	0	0.00668909	0	0.790038	0	0.736029	0.716889
GSM5609283	0.0189793	0	0.00906912	0.0738572	0.00990109	0	0.0780162	0	0.00383662	0.0116503	0.0721737	0	0	0.0754112	0.00857353	0.00627511	0	0.00554726	0.0374531	0	0	0.589256	0	0.656699	0.760284
GSM5609284	0.0632909	0	0.00680616	0	0.0131878	0	0	0.020954	0	0.0182538	0.0366893	0	0	0.0456857	0	0.00222049	0	0.00896125	0	0	0	0.783951	0	0.834481	0.568177
GSM5609285	0	0.00892334	0.0121534	0	0.0157686	0	0.016695	0	0.00872836	0.00604704	0.0256318	0	0.076098	0.0323192	0	0	0	0	0.0289533	0	0	0.768682	0	0.702223	0.759009
GSM5609286	0.0239942	0	0.00766664	0	0.0294515	0	0.00415196	0.00992152	0	0.00757187	0.0558146	0	0	0.0555502	0	0	0	0.00857849	0.00132301	0	0	0.795976	0	0.714856	0.74649
GSM5609287	0.0416431	0	0.00278401	0	0.0282523	0	0.00063012	0.0146108	0	0.00944266	0.0485605	0	0.0378469	0.0422367	0	0	0	0	0.00985749	0	0	0.764135	0	0.514203	0.960635
GSM5609288	0.0132023	0.0046607	0.00473936	0	0.03392	0	0	0	0	0.00116251	0.0343954	0	0	0	0	0.0198168	0.00581676	0.0097108	0.0313635	0	0	0.841212	0	0.823931	0.600811
GSM5609289	0.0160283	0.0163603	0.00139878	0.0266471	0	0.0847954	0.0135457	0	0.00263016	0	0.0427494	0	0	0.0105986	0	0.0137763	0	0	0.0396913	0	0	0.731779	0	0.850863	0.530177
GSM5609290	0.0178161	0.00877534	0.00198015	8.76442e-05	0.0224376	0	0.00722763	0.0203125	0	0	0.0247715	0	0	0	0	0.0199293	0	0.00385563	0.0259417	0	0	0.846865	0	0.829269	0.593419
GSM5609291	0.022604	0.0128891	0.00242253	0.00979722	0.000420095	0.0665171	0.0385028	0	0.0108009	0	0.0516931	3.39217e-05	0.100446	0	0	0.0100951	0	0.0106247	0.0344121	0	0	0.628742	0	0.823727	0.568874
GSM5609292	0.0171154	0.0035621	0.0156905	0.00334718	0.0177844	0	0.010753	0.0102895	0.0127019	0.0050964	0.0503149	0	0	0.0257738	0	0	0	0.00355916	0.00850671	0	0	0.815505	0	0.567414	0.924203
GSM5609293	0.0307954	0.00156799	0.00572489	0.0168326	0.0391299	0.0357587	0.0388694	0	0.00624125	0.0052534	0.0405595	0	0.00956896	0.0263339	0	0	0	0.0084411	0.0198122	0	0	0.715111	0	0.814107	0.586444
GSM5609294	0.0105237	0.000432269	0.00728608	0	0.0323933	0	0.003745	0.0132692	0	0.016519	0.0526693	0	0	0.0469893	0	0.0160252	0	0.00870287	0	0	0	0.791445	0	0.857212	0.530329
GSM5609295	0.0120186	0	0.00878317	0	0.0375226	0	0.00154529	0	0	0	0.0420978	0	0	0.00651334	0	0	0	0	0.0134006	0	0	0.878119	0	0.757641	0.719454
GSM5609296	0.0176436	0.00211583	0.00609791	0.000722899	0.0395759	0	0	0.00958725	0	0.00159652	0.0444302	0	0	0	0	0.0353876	0.00490419	0	0.0314685	0	0	0.80647	0	0.847263	0.549973
GSM5609297	0.0564074	0.0174254	0.00556731	0.0570631	0	0.0131832	0	0	0.062268	0	0.0127668	0.0292273	0.0461802	0.0547534	0	0	0	0	0.0417592	0	0	0.603399	0.013	0.252312	1.09887
GSM5609298	0.031755	0	0.00554449	0	0.0346514	0	0.000479343	0.022081	0	0.0159155	0.0527319	0	0	0.0444974	0	0.00226818	0	0.00464832	0.00819013	0	0	0.777237	0	0.742648	0.702656
GSM5609299	0.0144102	0.0102355	0.0104292	0	0.0434838	0	0.0214983	0.00168652	0	0.00371854	0.0419817	0	0	0.0534875	0	0	0	0.0107826	0.0285958	0	0	0.75969	0.006	0.34485	1.10409
GSM5609300	0.0135674	0.00513513	0.00466139	0	0.0266342	0	0	0.00950876	0	0	0.0363078	0	0	0	0	0.000682037	0	0	0.00874056	0	0	0.894763	0	0.79481	0.670447
GSM5609301	0	0.0209901	0	0.0404545	0	0.100488	0.0356012	0	0	0	0.137142	0	0.00327086	0	0	0.00855421	0	0.000841677	0.0175868	0	0	0.635071	0	0.758043	0.655431
GSM5609302	0.0341973	0.00822683	0.00111601	0.210183	0	0	0.051192	0	0	0	0.104951	0	0	0.000780694	0	0.00447082	0	0	0.0400404	0	0	0.544842	0	0.801259	0.607164
GSM5609303	0.0444091	0	0.0065757	0.0274145	0.0477193	0.00951887	0.0023925	0	0.00169623	0	0.0576492	0	0	0	0	0.0182491	0	0.0119149	0.0209969	0	0	0.751464	0	0.882446	0.476135
GSM5609304	0.0162718	0	0.0113256	0.0283193	0.0102441	0	0.0184953	0.0134058	0.00957303	0.00215369	0.0290646	0	0	0.0524088	0	0.0043215	0	0.00853003	0.0194308	0	0	0.776456	0	0.52881	0.945865
GSM5609305	0.0023871	0.0108975	0.00268621	0	0.0366177	0	0	0.00487582	0	0.00744527	0.0573223	0	0	0	0	0	0	0.0109864	0	0.0102444	0	0.856537	0	0.85721	0.547968
GSM5609306	0.0289017	0	0.00572015	0	0.0416392	0	0	0.00659417	0	0.00584607	0.0502563	0	0	0.0455059	0	0	0	0	0.00482986	0	0	0.810707	0	0.780256	0.660967
GSM5609307	0.0155418	0	0.00890542	0	0.0182377	0	0.00269005	0	0.0142573	0.0109803	0.0475655	0	0.0117096	0.0536552	0	0	0	0	0.0024578	0	0	0.813999	0	0.657498	0.826967
GSM5609308	0.028366	0	0.00698415	0.00534189	0.0357356	0	0.00915412	0	0.00569383	0.0186012	0.0481974	0	0	0.0753665	0	0	0	0	0	0	0.0200791	0.74648	0.001	0.440582	1.01951
GSM5609309	0.0217595	0	0.0221716	0	0.0180131	0.0214691	0	0.0114056	0	0.0071684	0	0.00102818	0	0	0	0.0273263	0	0.00774473	0.0373811	0	0	0.824532	0	0.523708	0.973027
GSM5609310	0.022618	0	0.00840144	0.0504725	0	0.0987643	0.0237287	0	0.00748158	0	0.0547568	0	0	0.0432856	0	0.0164739	0	0	0.033532	0	0	0.640485	0	0.760011	0.65254
GSM5609311	0.0186395	0	0.00859107	0.0083417	0.0195297	0.00267921	0.0102247	0	0.0030292	0.0113205	0.0473833	0	0.0348042	0	0	6.7552e-05	0.0090477	0	0.0303093	0	0	0.796032	0	0.859603	0.527396
GSM5609312	0.0288267	0	0.00873165	0	0.0303133	0	0.00427437	0.00862847	0	0.0134348	0.0391549	0	0.0508215	0.0420024	0	0	0	0	0.0222355	0	0	0.751576	0	0.695135	0.75951
GSM5609313	0.0272885	0.00381382	0.00449846	0.0277696	0.010581	0.0175963	0	0	0.0495913	0	0.0254618	0.0312727	0.119575	0.0423493	0	0	0	0	0.0453595	0	0	0.594843	0	0.719809	0.698519
GSM5609314	0.0221933	0.00109215	0.00626882	0.067727	0	0	0.0541117	0	0.00569674	0	0.154433	0	0	0.0172577	0.000984015	0	0	0	0.0191593	0	0	0.651076	0.001	0.447685	0.967609
GSM5609315	0	0.0211589	0.00490368	0	0.0346478	0	0.00527853	0	0	0.00715623	0.0490647	0	0	0	0	0	0.00248899	0.00462281	0	0	0.0350298	0.835649	0	0.88347	0.491057
GSM5609316	0.0784771	0.114933	0	0.0851266	0	0	0.0412492	0	0.0556659	0	0.057766	0	0	0.0553956	0	0	0	0.00390731	0.00968946	0	0	0.49779	0.007	0.331723	0.999822
GSM5609317	0.0156038	0	0.00662251	0	0.0270584	0	0.00377568	0.0113115	0	0.0118716	0.0446004	0	0	0.0223619	0	0	0	0.0114848	0	0	0	0.845309	0	0.802968	0.637709
GSM5609318	0.0192759	0.0194289	0.000957719	0.0102191	0.0135011	0.0199441	0	0.00255658	0	0	0.0427055	0	0	0	0	0.0406485	0.00332295	0.00803785	0.0433563	0	0	0.776045	0	0.831337	0.569746
GSM5609319	0.0203625	0	0.011704	0.00525178	0.0329551	0	0	0.00688484	0	0	0.04258	0	0	0	0	0.0049832	0	0.0122279	0.0175304	0	0	0.84552	0	0.691746	0.793338
GSM5609320	0.0377915	0	0.0504546	0.000195141	0.0191935	0.00433265	0.0270122	0	0	0	0.0532181	0	0	0.0148199	0	0.00222523	0	0.0107601	0.0279804	0	0	0.752017	0.002	0.381027	1.06542
GSM5609321	0.0119727	0.00957235	0.00283246	0.0858854	0	0	0.0409594	0.00859616	0.0148257	0	0.148201	0	0	0.0716987	0.00120209	0	0	0	0.013885	0	0	0.590369	0	0.580259	0.835276
GSM5609322	0.00903739	0	0.017721	0.0170142	0	0.0155148	0.0368469	0	0	0	0.0674099	0	0.0181464	0.0450942	0	0	0	0	0.0254502	0	0	0.747765	0.001	0.432253	1.02437
GSM5609323	0.0163755	0.000232513	0.0158106	0.00285211	0.000259927	0.0229614	0.0145425	0	0.00886657	0	0.0870912	0	0	0.0964587	0	0.0068838	0	0	0	0	0	0.727665	0	0.47876	0.975566
GSM5609324	0.00488442	0	0.00442521	0	0.0315798	0	0.00998823	0.00792272	0	0.00867662	0.0324368	0	0.142523	0.00411171	0	0	0	0.00177041	0.0214208	0	0	0.730261	0	0.86848	0.503924
GSM5609325	0.0163216	0	0.00887544	0.00323678	0.0245984	0	0.00221659	0.00978591	0.0101671	0.0113881	0.0502116	0	0	0.0577353	0	0.0198796	0	0	0	0.00130651	0	0.784277	0	0.836957	0.564387
GSM5609326	0.0443048	0	0.00824504	0.00671137	0.0602055	0.0437968	0.00145794	0	0	0	0.0609925	0	0	0.049526	0	0.0129021	0	0.00962645	0.0179989	0	0	0.684233	0	0.865258	0.504929
GSM5609327	0.0386771	0	0.00561296	0.089189	0	0.0253148	0.0207183	0	0.00778681	0	0.101822	0	0	0	0	0.00851882	0.000331087	0.0105717	0.0219685	0	0	0.669489	0	0.808894	0.591541
GSM5609328	0	0.0257306	0.00467377	0	0.0289638	0	0.0117009	0.00325909	0	0.00429987	0.023965	0	0	0	0	0	0	0.0135791	0.0229563	0	0	0.860871	0	0.78608	0.668275
GSM5609329	0.0441279	0	0.00388406	0.0762741	0	0.0675992	0.0425802	0	0.00186966	0	0.109787	0	0.00537829	0.0508196	0	0.0158182	0	0.00845718	0	0	0.00484587	0.568559	0	0.475238	0.917185
GSM5609330	0.0301748	0	0.00743567	0	0.0257261	0	0.00637135	0.0121272	0	0.0113053	0.0439536	0	0	0.0396095	0	0.00109337	0	0.00959061	0.00651244	0	0	0.8061	0	0.842489	0.55948
GSM5609331	0.0225198	0	0.0127655	0.0090823	0	0.0551302	0	0.00951159	0.0100302	0	0.0418785	0	0	0	0	0.000940736	0.00109454	0.0129949	0.0247081	0	0	0.799344	0	0.720169	0.736941
GSM5609332	0.0232077	0.000365739	0.0057242	0.0390022	0	0.0234622	0.00728042	0.0129695	0.0185316	0	0.110392	0	0	0.0196243	0	0	0	0.00583093	0.0285664	0	0	0.705043	0	0.774063	0.642636
GSM5609212	0.0607867	0.0118754	0.00318885	0.0638031	0.000955736	0.0788634	0.00660313	0	0.0900511	0	0.0172011	0.0473234	0.0276246	0	0	0.00918065	0	0	0.0571525	0	0	0.52539	0	0.676029	0.737892
GSM5609213	0.0501952	0.0297496	0.0198038	0.0772865	0.0313883	0.0277792	0.0446219	0	0.044805	0	0.153573	0.00521935	0.0180603	0	0.00221682	0	0.00701861	0	0.0559993	0	0	0.432283	0.022	0.203871	1.05869
GSM5609214	0.0433598	0.0298973	0	0.10977	0	0.12233	0.013874	0	0.0226544	0	0.118568	0	0.111284	0	0	0	0	0	0.0248147	0	0	0.403448	0	0.672243	0.743015
GSM5609215	0.0742058	0	0.00414468	0.184914	0	0.0729833	0.0476354	0	0.0359348	0	0.142793	0.0189406	0.05251	0	0	0.0100773	0.00488754	0	0.0530404	0	0	0.297933	0	0.532477	0.846199
GSM5609216	0.0363556	0.0495133	0	0.0790594	0.0112028	0.173475	0.0118395	0	0.00438049	0.00355514	0.059167	0.00658135	0.0243321	0	0	0.00482929	0	0	0.0404134	0	0	0.495296	0	0.754056	0.663933
GSM5609217	0.0456424	0.0388596	0	0.191683	0	0.0409762	0	0	0.106025	0	0.0271167	0.0616464	0	0	0	0.000511486	0.0118645	0	0.0440239	0	0	0.431651	0	0.701957	0.717901
GSM5609218	0.0215356	0.00325847	8.67646e-05	0.0827962	0.0201092	0.206812	0.0477639	0	0	0.0414678	0.0371233	0	0.0888175	0	0	0.0140849	0	0	0.0324882	0	0	0.403656	0	0.832521	0.598617
GSM5609219	0.0204831	0.000681375	0	0.110687	0.048461	0.107934	0.0628644	0	0	0	0.116837	0	0	0	0	0.00299849	0	0.00329886	0.0140803	0	0	0.511675	0	0.82608	0.582648
GSM5609220	0.050045	0.0350382	0.00280048	0.0517673	0.0690952	0.19451	0.0150477	0	0	0	0.0908392	0	0.0171917	0.00163091	0	0.00286668	0	0	0.0160742	0	0	0.453094	0	0.748221	0.673851
GSM5609221	0.016743	0	0	0.04509	0.0383106	0.140827	0.0059062	0	0	0	0.0750685	0.00299014	0	0.00560295	0	0.000702906	0	0	0.0263104	0	0	0.642448	0	0.857852	0.519867
GSM5609222	0.140285	0	0.00278163	0.0922484	0.0515142	0.160218	0.0463329	0	0	0	0.139424	0	0.0195459	0	0	0.00550232	0	0	0	0	0	0.342147	0	0.704718	0.72339
GSM5609223	0.0350873	0	0.000190127	0.0729748	0.136261	0.214216	0.0378294	0	0	0	0.0902121	0	0.0350727	0	0	0.0101087	0	0.00153222	0.0130527	0	0	0.353463	0	0.744613	0.687438
GSM5609224	0.0132424	0.0059549	0.00301699	0.0615755	0.0116997	0.127133	0.00957515	0	0.0048197	0	0.0595311	0	0.0733337	0	0	0	0	0.000279067	0.0268138	0	0	0.603025	0	0.853357	0.528754
GSM5609225	0.0227987	0.00725983	0	0.102371	0.0845501	0.221711	0.0315463	0	0	0	0.0550537	0	0.0642526	0	0	0	0	0.00300961	0.00342455	0	0	0.404023	0	0.75169	0.673066
GSM5609226	0.074414	0	0	0.0891593	0.145487	0.265762	0.0169822	0	0.00602415	0	0.0641791	0	0.0409907	0	0	0.00139719	0	0.00344419	0.00119867	0	0	0.290962	0	0.715643	0.714994
GSM5609227	0.0301192	0.00235897	0	0.0329197	0.00630543	0.197129	0.0195121	0	0	0	0.0555996	0	0.0368258	0.00339424	0	0	0	0	0.00713085	0	0	0.608705	0	0.771855	0.637288
GSM5609228	0.0517787	0	0.0048672	0.102431	0	0.188381	0.0167263	0	0.000965561	0	0.06835	0	0.0084334	0	0	0	0.000381455	0.0116314	0.0233881	0	0	0.522666	0	0.754903	0.660461
GSM5609229	0.0398267	0	0.00255261	0.0806034	0	0.10418	0.0309644	0	0.0230357	0	0.079539	0	0.0252818	0	0.000569144	0	6.49451e-05	0.00173118	0.00909581	0	0	0.602556	0	0.791313	0.614053
GSM5609230	0.0248365	0.00632756	0	0.135712	0.0561169	0.175806	0.0164923	0	0.00793742	0	0.0713247	0	0.0109692	0.00186787	0	0	0	0.00275531	0	0	0	0.489855	0	0.779048	0.636265
GSM5609231	0.00839033	0.014281	0.00064792	0.196372	0.0248648	0.206212	0.0506994	0	0	0	0.128848	0	0.0425862	0	0	0.00321524	0	0	0.0129159	0	0	0.310967	0	0.759385	0.676201
GSM5609232	0.00921261	0.0281696	0	0.100386	0	0.105095	0.0199661	0	0.0080894	0	0.131582	0	0.0101493	0.00421047	0	0	0	0	0.0181103	0	0	0.565029	0	0.775086	0.635112
GSM5609233	0.0528349	0	0.00349809	0.269928	0	0.0882539	0.0423462	0	0.000894291	0	0.12644	0	0	0	0	0	0.00334093	0.0117245	0.0158006	0	0	0.384939	0	0.759839	0.668635
GSM5609234	0.00957321	0.00737124	0.00150612	0.107592	0.0355314	0.181351	0.0240688	0	0	0	0.0365519	0	0.0513451	0	0	0	0.000932227	0	0.0148621	0	0	0.529315	0	0.798561	0.609468
GSM5609235	0.00457593	0.0104657	0	0.0922714	0.0199776	0.214238	0.0296117	0	2.00908e-05	0	0.114377	0	0.0778826	0.00268461	0	0.00521363	0	0	0.00569181	0	0	0.42299	0	0.766676	0.656302
GSM5609236	0.0358342	0.0229173	0	0.102233	0.013444	0.23442	0.0160809	0	0.0174353	0	0.110636	0	0.0520846	0	0.00174175	0	0.00233296	0	0.0065172	0	0	0.384323	0	0.783145	0.648808
GSM5609237	0.0388823	0	0.00561408	0.0434916	0	0.128507	0.02379	0	0.00119987	0	0.0739787	0	0.0491403	0.00503805	0	0	0	0	0.0273901	0	0	0.602968	0	0.692994	0.726064
GSM5609238	0	0.020318	0	0.0875186	0.0142205	0.120237	0.0284201	0	0	0	0.0925859	0	0	0.00286048	0	0.00252037	0	0	0.00386451	0	0	0.627455	0	0.83845	0.549972
GSM5609239	0.00115783	0.019308	0	0.064693	0.07308	0.178983	0.0111856	0	0	0	0.117722	0	0.0310925	0.00117755	0	0	0	0	0.00429445	0	0	0.497306	0	0.773874	0.640543
GSM5609240	0.0373483	0	0.0315291	0.0837148	0	0.261895	0.0232942	0	0	0	0.071977	0	0	0	0	0	0	0.00869103	0.00710281	0	0	0.474448	0.001	0.469844	0.900585
GSM5609241	0.0384574	0	0.000737593	0.0480683	0.00625036	0.151236	0.0429792	0	0	0	0.14916	0	0.0272947	0.00342401	0	0.00145736	0	0	0.0224804	0	0	0.508455	0	0.756698	0.658893
GSM5609242	0.010557	0.0157321	4.6559e-05	0.0656928	0.0540502	0.148379	0.0238097	0	0	0	0.0847456	0	0.0125042	0.0044151	0	0.0072071	0	0.00302358	0.0153685	0	0	0.554468	0	0.777714	0.632458
GSM5609243	0.0164874	0	0.00114139	0.133774	0	0.119199	0.047825	0	0	0	0.167713	0	0.00074515	0.00179095	0	0.000658303	0	0	0.0230234	0	0	0.487643	0	0.792297	0.622553
GSM5609244	0.0673026	0	0	0.126646	0	0.146747	0.0605393	0	0.00398643	0	0.121387	0	0.0147884	0	0	0	0.00304455	0.00952451	0.0298966	0	0	0.416138	0	0.726822	0.69833
GSM5609245	0.0509726	0.0102544	0	0.149692	0.00882435	0.0775423	0.0329041	0	0.0121023	0	0.0980038	0	0	0.000496828	0	0	0	0	0.0187065	0	0	0.5405	0	0.74309	0.671805
GSM5609246	0.128374	0.00802062	0	0.0703338	0	0.0776498	0.049755	0	0.0590957	0	0.0914225	0.000392693	0	0	0	0	0.0100131	0	0.0489829	0	0	0.45596	0	0.675956	0.739726
GSM5609247	0.0300656	0.00311121	0.00279706	0.0129049	0	0.065139	0.00225523	0.0116661	0.0207227	0	0.068383	0	0	0.00828445	0	0	0.00572692	0	0.01139	0	0	0.757554	0	0.840208	0.551953
GSM5609248	0.0714696	0	0	0.097937	0	0.0745022	0.00349171	0	0.0464485	0	0.0678247	0	0.00762839	0	0	0	0.0019823	0.00982208	0.00781711	0	0	0.611076	0	0.639082	0.781736
GSM5609249	0.0742112	0	0	0.153303	0	0	0.0567643	0	0.068373	0	0.18142	0	0.0875436	0	0	0	0.00686433	0	0.0332896	0	0	0.338231	0	0.71619	0.713176
GSM5609250	0.0882583	8.48575e-05	0	0.187523	0	0.0792123	0.0457854	0	0.0648014	0	0.188091	0	0.00351525	0	0	0.0268862	0.00447019	0	0.0272266	0	0	0.284145	0	0.640539	0.773533
GSM5609333	0.0211604	0.0055922	0.00344945	0.13783	0.0156933	0.147478	0.0560777	0	0	0	0.123081	0	0.00917981	0	0	0.015794	0.00236681	0.00494731	0.0347165	0	0	0.422633	0	0.766901	0.660772
GSM5609334	0.0200285	0.035599	0.000432445	0.014215	0.0504787	0.11933	0.0216383	0	0	0	0.063335	0	0	0	0	0.00157457	0	0	0.0237115	0	0	0.649658	0	0.799121	0.603157
GSM5609335	0.0350213	0	0	0.04373	0.0376829	0.145777	0.0232325	0	0	0	0.0961746	0	0	0	0	0.00818553	0	0.000366543	0.031013	0	0	0.578817	0	0.767783	0.642932
GSM5609336	0.0225605	0.020864	0.00215502	0.0287059	0.0951086	0.0420144	0.0263541	0	0	0	0.0976713	0	0	0.00228259	0	0.00209401	0	0	0.00319443	0	0	0.656995	0	0.816873	0.579336
GSM5609337	0.0540886	0	0	0.0816674	0.0412861	0.0964724	0	0	0.0245229	0	0.0468109	0.0120353	0.0880544	0	0	0.00259259	0	0	0.0281763	0	0	0.524293	0	0.807617	0.599522
